# Supplementary material for: Anion-induced thermoresponsiveness in cationic polycysteine and DNA binding
Source: Royal Society of Chemistry journal article supplement (doi:10.1039/d1py01187a), 2021-01-01
Supplement: d1py01187a1.pdf [file d1py01187a1.pdf]

## Electronic Supplementary Information

### **Anion-Induced Thermoresponsiveness in Cationic Polycysteine and DNA Binding**

Mahammad Anas, Priyanka Dinda, Mahuya Kar and Tarun K. Mandal\*

*School of Chemical Sciences, Indian Association for the Cultivation of Science, Jadavpur,  
Kolkata 700032, India*

| <b>Contents</b>                                                                                                                | <b>Page No.</b> |
|--------------------------------------------------------------------------------------------------------------------------------|-----------------|
| Scheme S1. Synthesis scheme for PCys-Cl and P[Cys-PPh <sub>3</sub> ] <sup>+</sup> [Cl <sup>-</sup> ]                           | S3              |
| Figure S1. FTIR spectra of all the compounds                                                                                   | S4              |
| Figure S2. ESI-MS spectrum of 2-BrEt-Ac                                                                                        | S5              |
| Figure S3. <sup>1</sup> H-NMR spectrum of 2-BrEt-Ac                                                                            | S6              |
| Figure S4. <sup>13</sup> C-NMR spectra of 2-BrEt-Ac, Cys-Br, Cys-Br NCA and PCys-Br-1                                          | S7              |
| Figure S5. ESI-MS spectrum of Cys-Br                                                                                           | S8              |
| Figure S6. <sup>1</sup> H-NMR spectrum of Cys-Br                                                                               | S9              |
| Figure S7. ESI-MS spectrum of Cys-Cl                                                                                           | S10             |
| Figure S8. <sup>1</sup> H-NMR spectra of Cys-Cl, Cys-Cl NCA, PCys-Cl, P[Cys-PPh <sub>3</sub> ] <sup>+</sup> [Cl <sup>-</sup> ] | S11             |
| Figure S9. ESI-MS spectrum of Cys-Br NCA                                                                                       | S12             |
| Figure S10. <sup>1</sup> H-NMR spectrum of Cys-Br NCA                                                                          | S13             |
| Figure S11. MALDI-TOF-MS of Cys-Cl NCA                                                                                         | S14             |
| Figure S12. <sup>1</sup> H-NMR spectrum of PCys-Br-1                                                                           | S15             |
| Figure S13. <sup>1</sup> H-NMR spectrum of P[Cys-PPh <sub>3</sub> ] <sup>+</sup> [Br <sup>-</sup> ]-1                          | S16             |
| Figure S14. <sup>31</sup> P-NMR spectrum of P[Cys-PPh <sub>3</sub> ] <sup>+</sup> [Br <sup>-</sup> ]-1                         | S17             |
| Figure S15. <sup>1</sup> H-NMR spectrum of P[Cys-PPh <sub>3</sub> ] <sup>+</sup> [Br <sup>-</sup> ]-2                          | S18             |
| Figure S16. UV-Vis absorption spectra of neat ctDNA and Calibration curve                                                      | S19             |
| Figure S17. Zeta potential distribution of P[Cys-PPh <sub>3</sub> ] <sup>+</sup> [Br <sup>-</sup> ]-1                          | S20             |
| Figure S18. MALDI-TOF-MS of PCys-Br-1                                                                                          | S21             |

|             |                                                                                                                                                                           |     |
|-------------|---------------------------------------------------------------------------------------------------------------------------------------------------------------------------|-----|
| Figure S19. | SEC traces of PCys-Br-1, P[Cys-PPh <sub>3</sub> ] <sup>+</sup> [Br <sup>-</sup> ]-1 and P[Cys-PPh <sub>3</sub> ] <sup>+</sup> [Br <sup>-</sup> ]-1                        | S22 |
| Figure S20. | CD spectra of PCys-Br-1 and P[Cys-PPh <sub>3</sub> ] <sup>+</sup> [Br <sup>-</sup> ]-1                                                                                    | S23 |
| Figure S21. | TEM image of P[Cys-PPh <sub>3</sub> ] <sup>+</sup> [Br <sup>-</sup> ]-1                                                                                                   | S24 |
| Table S1.   | Particle size of anion induced P[Cys-PPh <sub>3</sub> ] <sup>+</sup> [Br <sup>-</sup> ]-1 aggregates                                                                      | S25 |
| Figure S22. | FESEM images of P[Cys-PPh <sub>3</sub> ] <sup>+</sup> [Br <sup>-</sup> ]-1 in presence of anions                                                                          | S26 |
| Figure S23. | Heating/cooling cycles vs % transmittance plot                                                                                                                            | S27 |
| Figure S24. | Temperature dependent $D_h$ variation of P[Cys-PPh <sub>3</sub> ] <sup>+</sup> [Br <sup>-</sup> ]-1 aggregates                                                            | S28 |
| Figure S25. | Turbidity plot of P[Cys-PPh <sub>3</sub> ] <sup>+</sup> [Br <sup>-</sup> ]-2 solution with SCN <sup>-</sup>                                                               | S29 |
| Figure S26. | Turbidity plot of P[Cys-PPh <sub>3</sub> ] <sup>+</sup> [Br <sup>-</sup> ] and P[Cys-PPh <sub>3</sub> ] <sup>+</sup> [Cl <sup>-</sup> ] with BF <sub>4</sub> <sup>-</sup> | S30 |
| Figure S27. | Turbidity plots of P[Cys-PPh <sub>3</sub> ] <sup>+</sup> [Br <sup>-</sup> ]-1 vs. polypeptide concentration                                                               | S31 |
| Figure S28. | Turbidity plots of P[Cys-PPh <sub>3</sub> ] <sup>+</sup> [Br <sup>-</sup> ]-1 vs. anion concentration                                                                     | S32 |
| Figure S29. | Turbidity plot of P[Cys-PPh <sub>3</sub> ] <sup>+</sup> [Br <sup>-</sup> ]-1 in presence of SDS                                                                           | S33 |
| Scheme S2.  | Polyplex formation of P[Cys-PPh <sub>3</sub> ] <sup>+</sup> [Br <sup>-</sup> ]-1 with ctDNA                                                                               | S34 |
| Figure S30. | The cell viability of KB cells with P[Cys-PPh <sub>3</sub> ] <sup>+</sup> [Br <sup>-</sup> ]-1                                                                            | S35 |
| Figure S31. | Titration plot of P[Cys-PPh <sub>3</sub> ] <sup>+</sup> [Br <sup>-</sup> ]-1 solution in presence of ctDNA                                                                | S36 |
| Figure S32. | Optical spectra of neat EtBr and EtBr-ctDNA intercalated complex                                                                                                          | S37 |
| Figure S33. | Photographs of the ctDNA-EtBr complex with P[Cys-PPh <sub>3</sub> ] <sup>+</sup> [Br <sup>-</sup> ]-1                                                                     | S38 |
| Figure S34. | Emission spectra of P[Cys-PPh <sub>3</sub> ] <sup>+</sup> /ctDNA vs NaCl concentration                                                                                    | S39 |

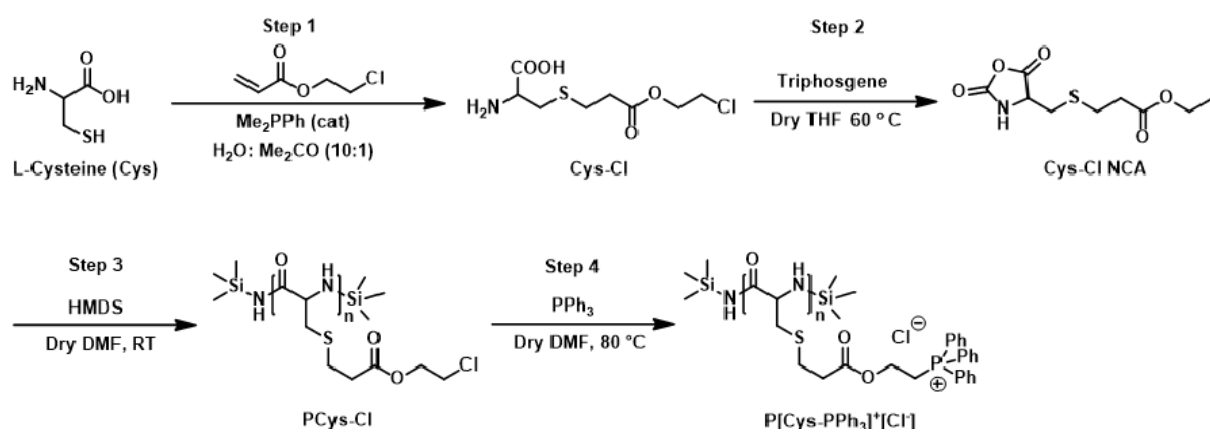

**Scheme S1.** Synthesis scheme for PCys-Cl and its cationization to  $\text{P}[\text{Cys-PPh}_3]^+\text{[Cl}^-]$

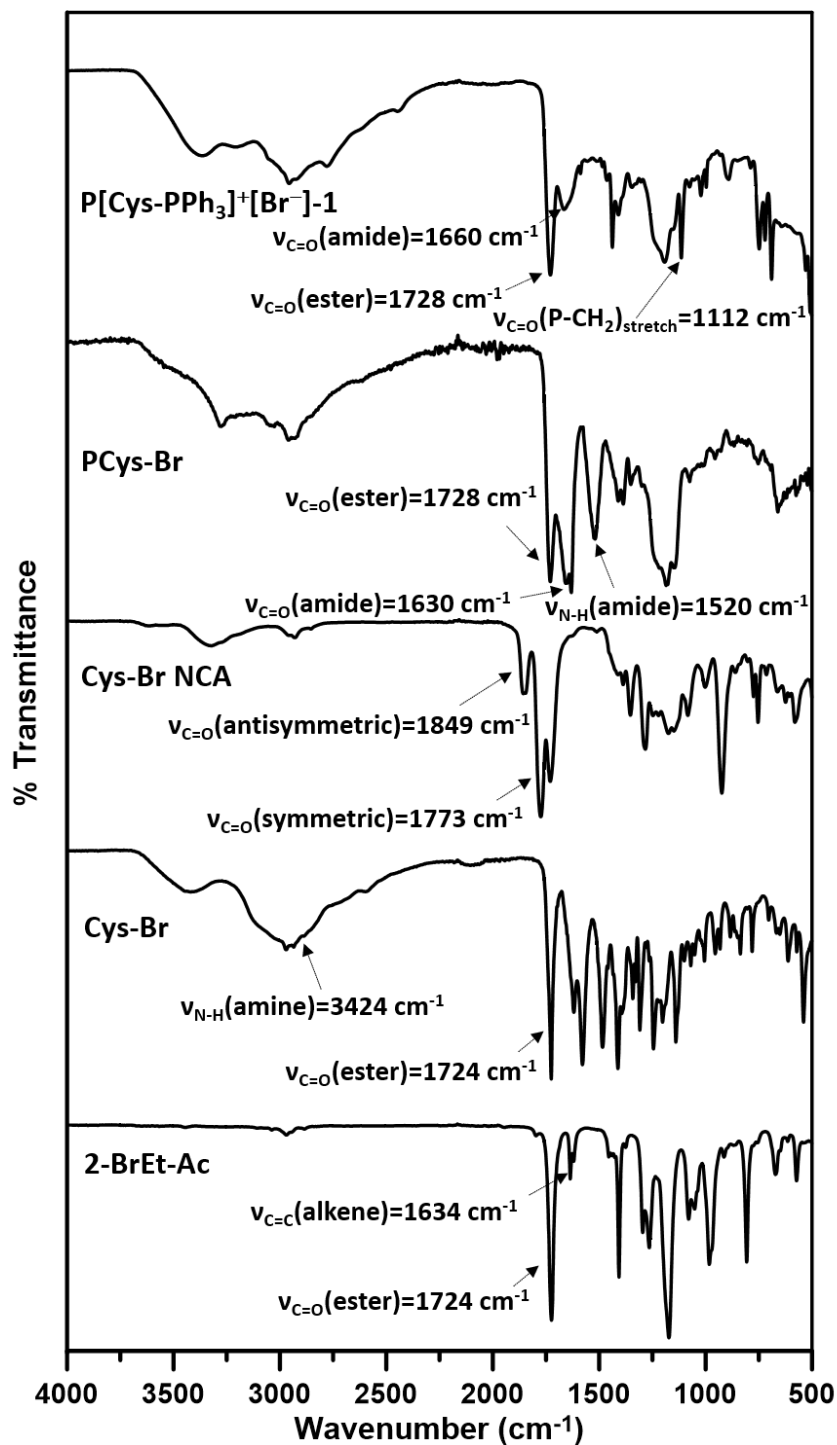

**Figure S1.** FT-IR spectra of all the as-synthesized compounds.

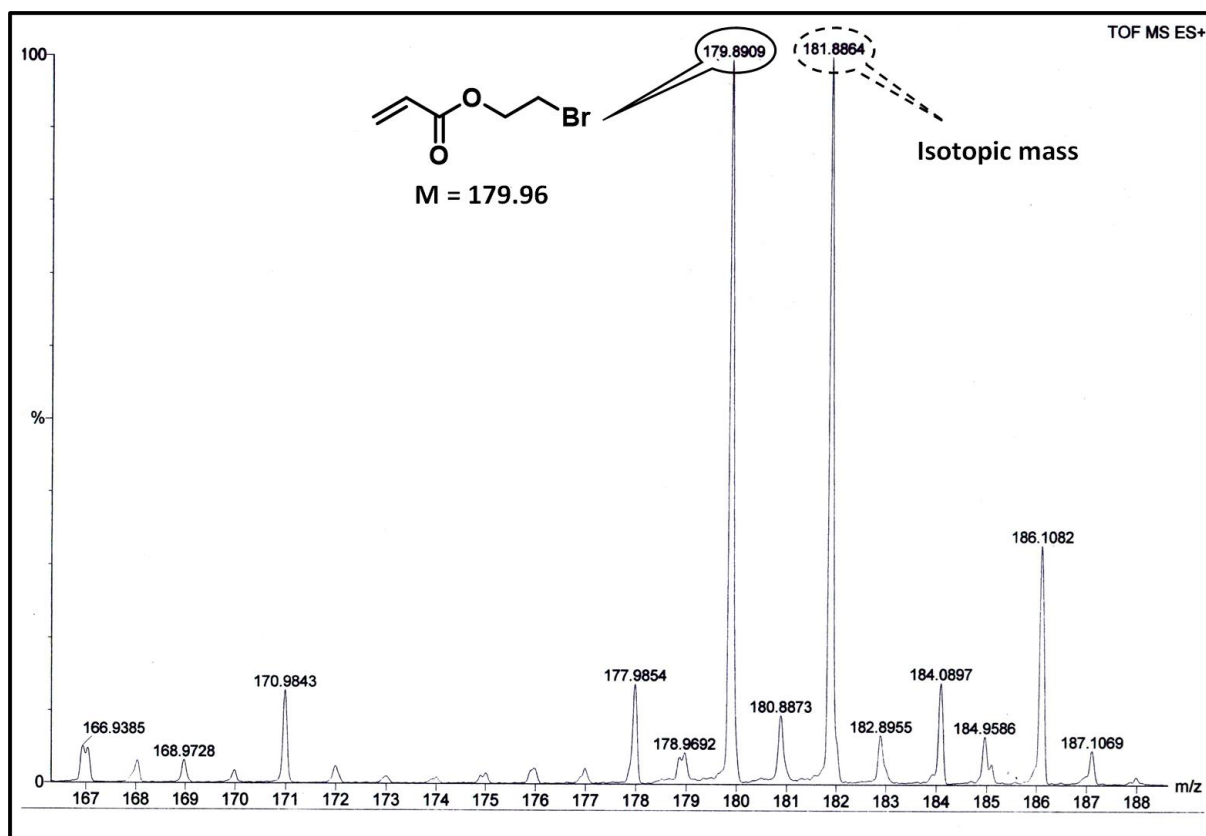

**Figure S2.** ESI-MS spectrum of 2-BrEt-Ac in DCM.

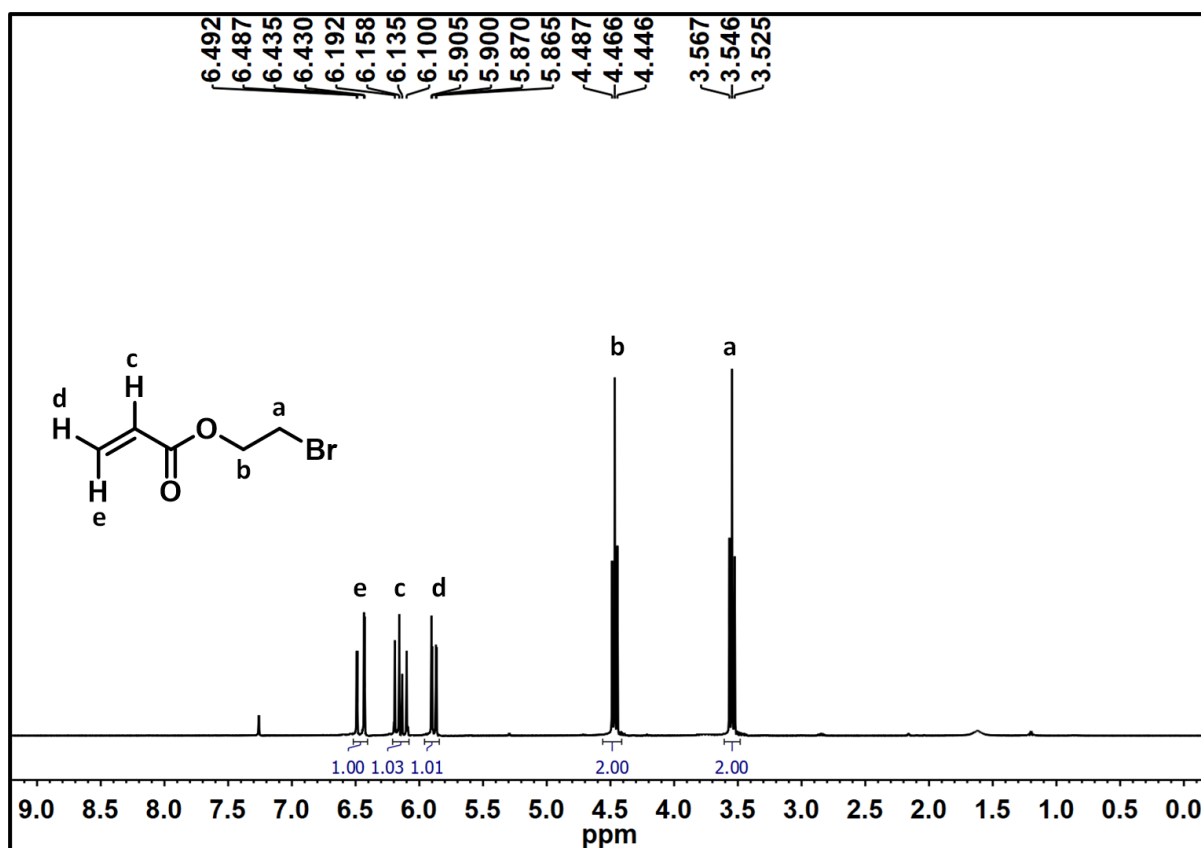

**Figure S3.** <sup>1</sup>H-NMR spectrum of 2-BrEt-Ac in CDCl<sub>3</sub>.

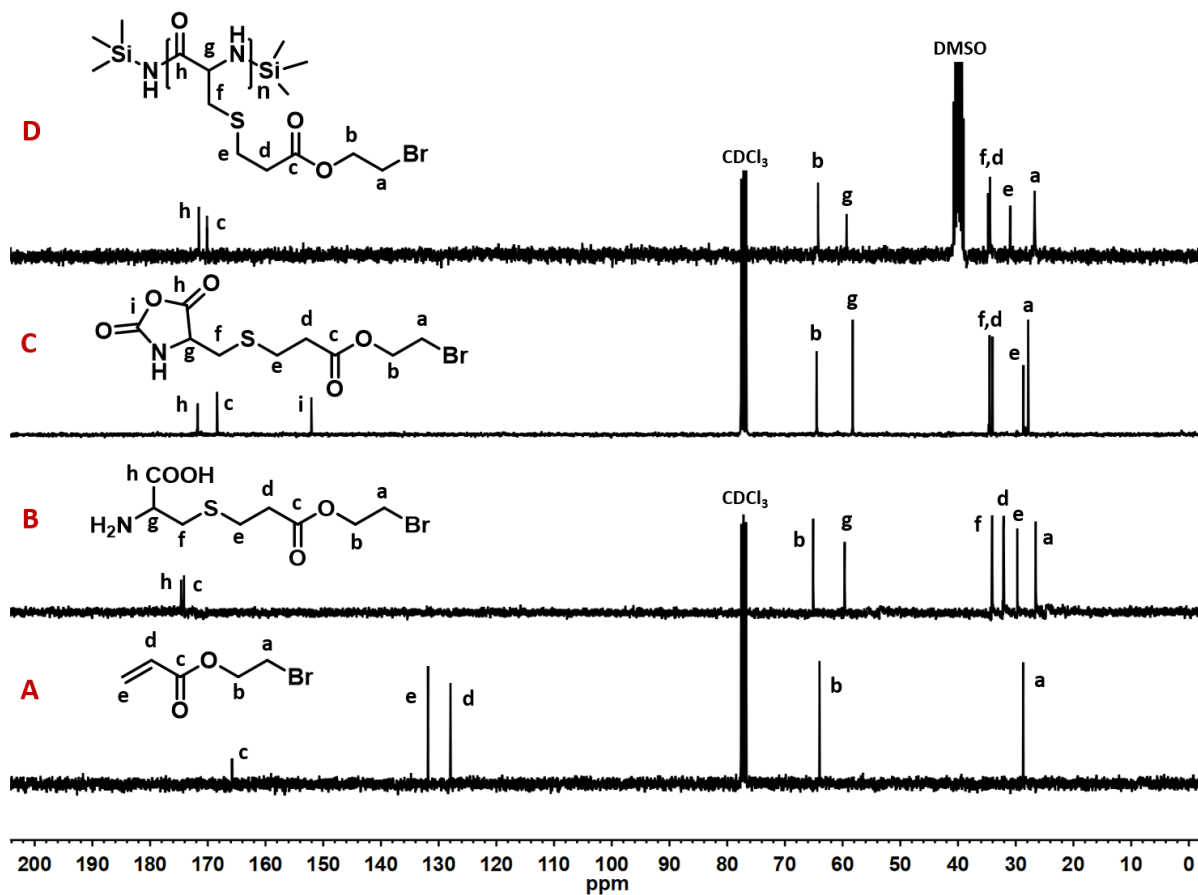

**Figure S4.**  $^{13}\text{C}$ -NMR spectra of 2-BrEt-Ac in  $\text{CDCl}_3$  (A), Cys-Br in  $\text{D}_2\text{O}$  (B), Cys-Br NCA in  $\text{CDCl}_3$  (C) and PCys-Br-1 in  $\text{DMSO-d}_6$  (D).

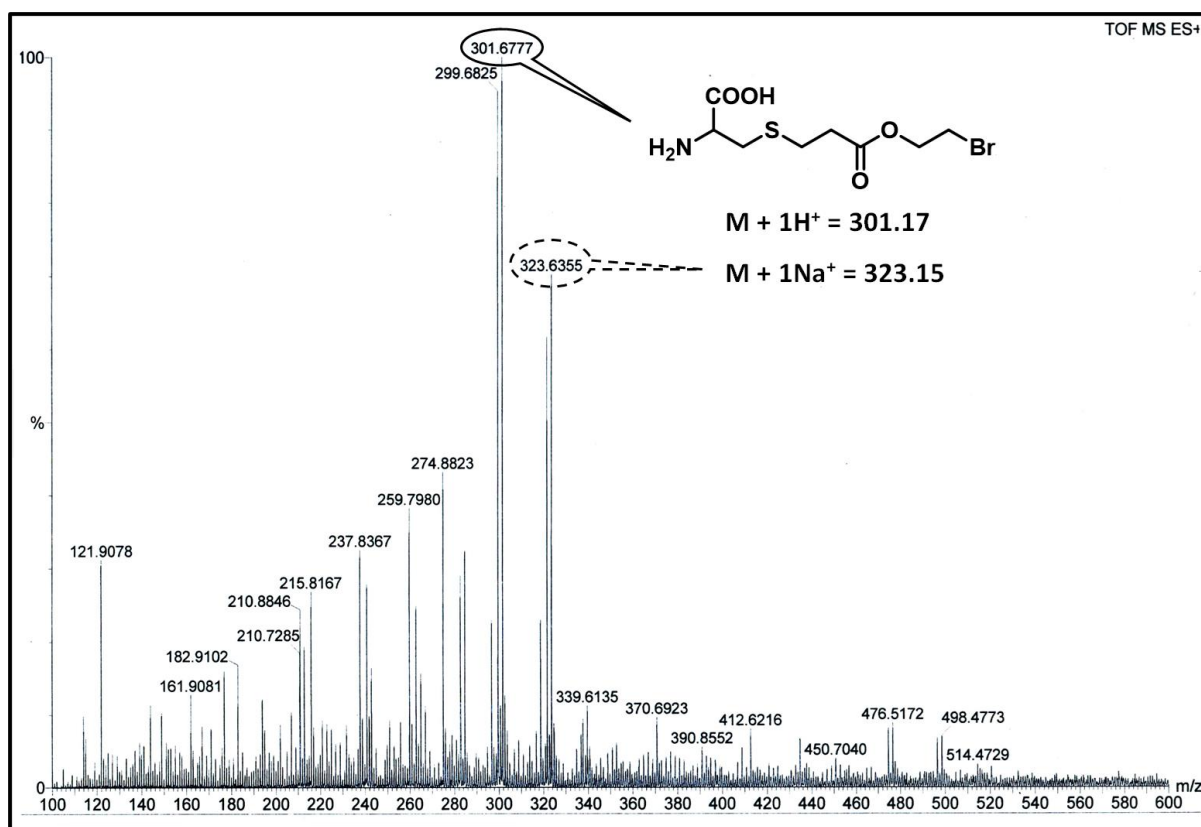

**Figure S5.** ESI-MS spectrum of Cys-Br in H<sub>2</sub>O: MeOH (1:1) mixture.



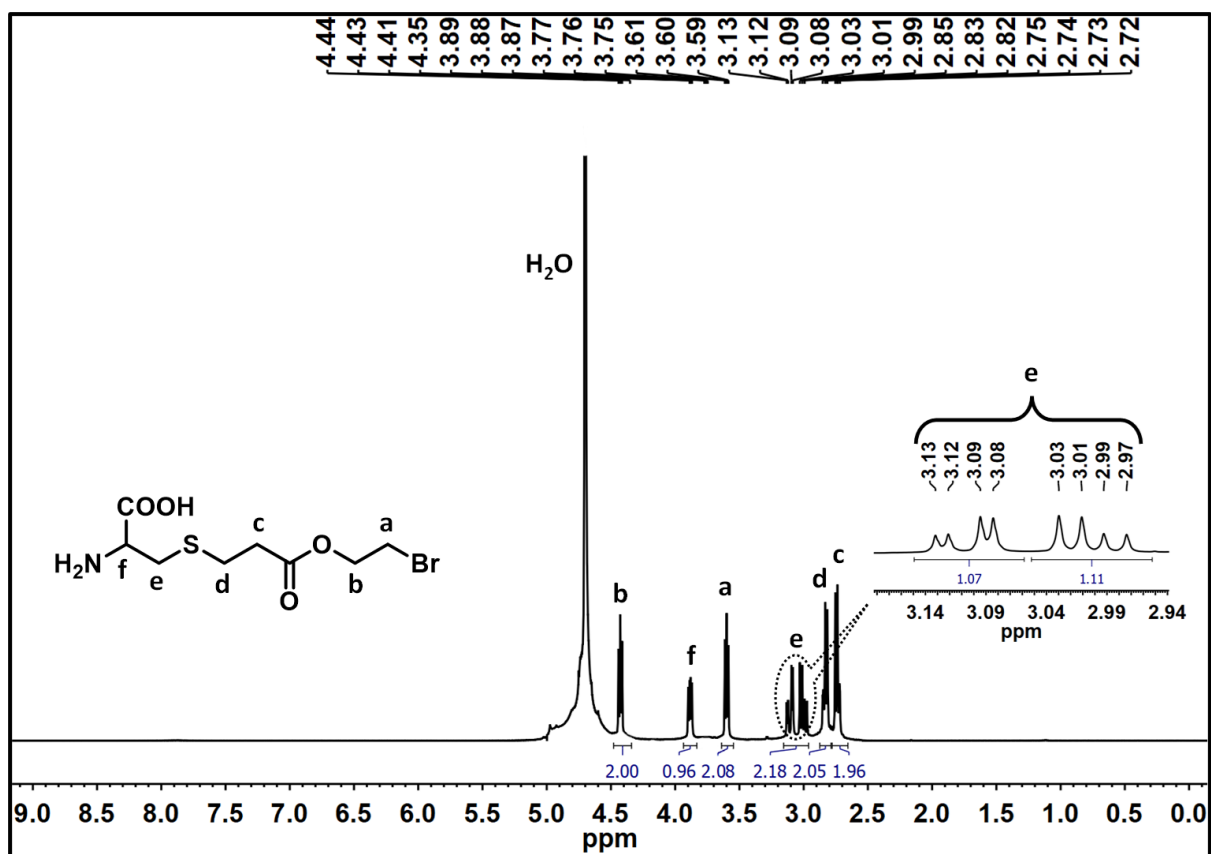

Figure S6.  $^1\text{H-NMR}$  spectrum of Cys-Br in  $\text{D}_2\text{O}$ .

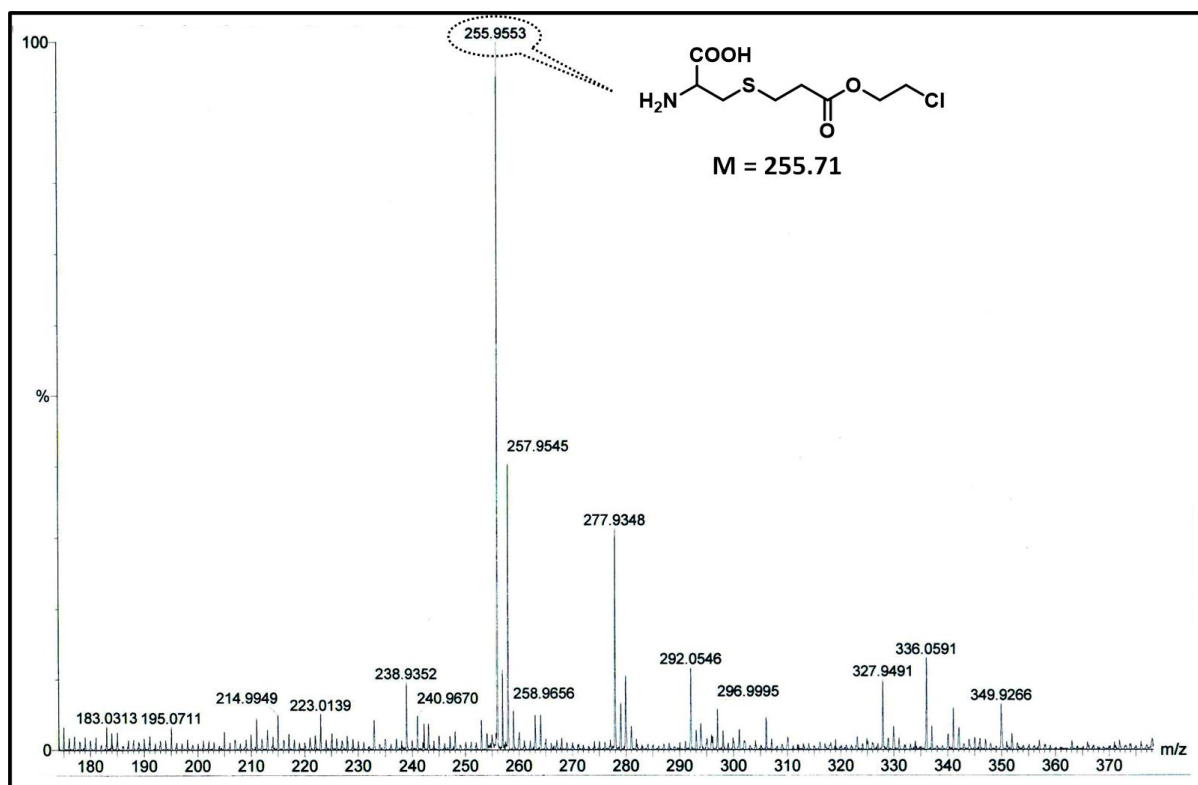

**Figure S7.** ESI-MS spectrum of Cys-Cl in H<sub>2</sub>O: MeOH (1:1) mixture.

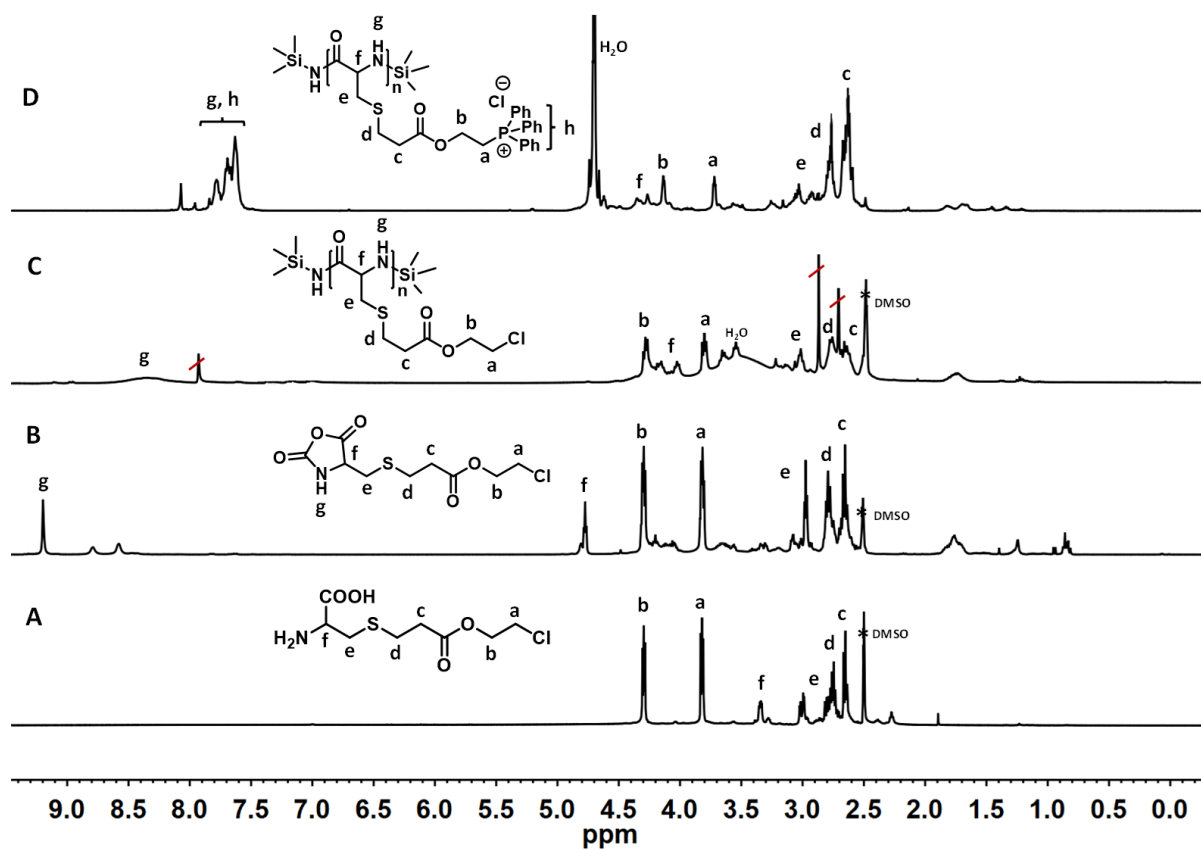

**Figure S8.**  $^1\text{H-NMR}$  spectra of Cys-Cl (A), Cys-Cl NCA (B), PCys-Cl (C) in  $\text{DMSO-d}_6$  and  $\text{P}[\text{Cys-PPh}_3]^+[\text{Cl}^-]$  (D) in  $\text{D}_2\text{O}$ .

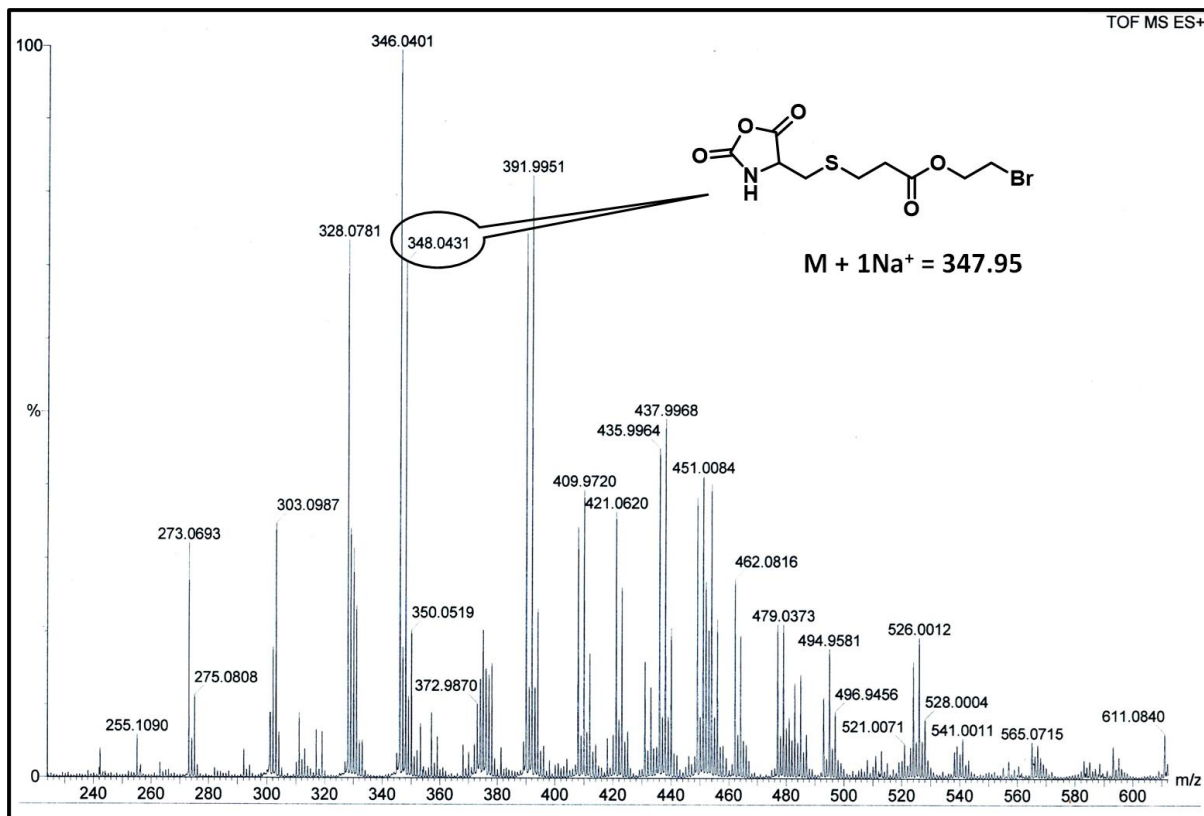

**Figure S9.** ESI-MS spectrum of Cys-Br NCA in DCM.

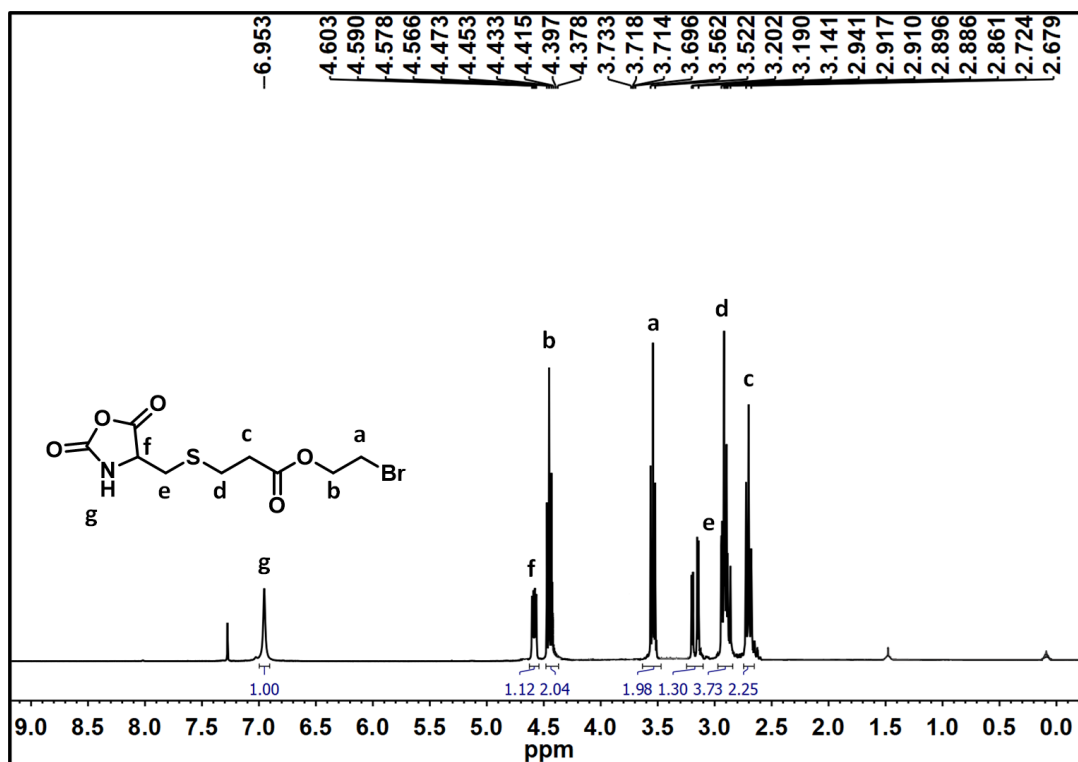

**Figure S10.**  $^1\text{H-NMR}$  spectrum of Cys-Br NCA in  $\text{CDCl}_3$ .

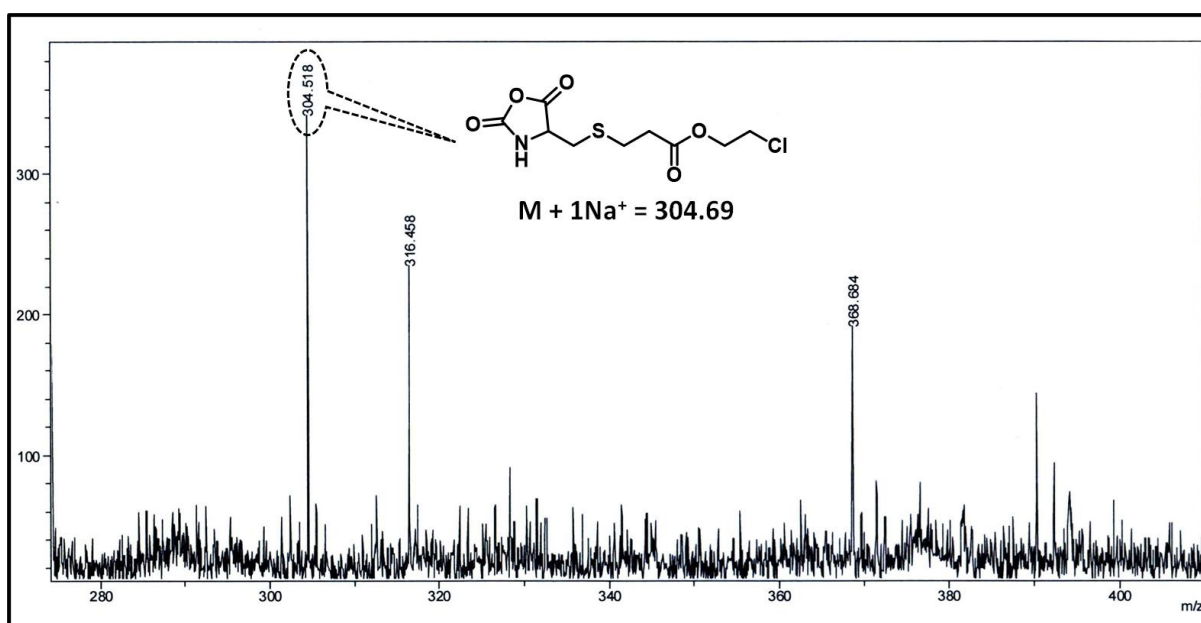

**Figure S11.** MALDI-TOF-MS of Cys-Cl NCA in THF using DCTB matrix and NaI.

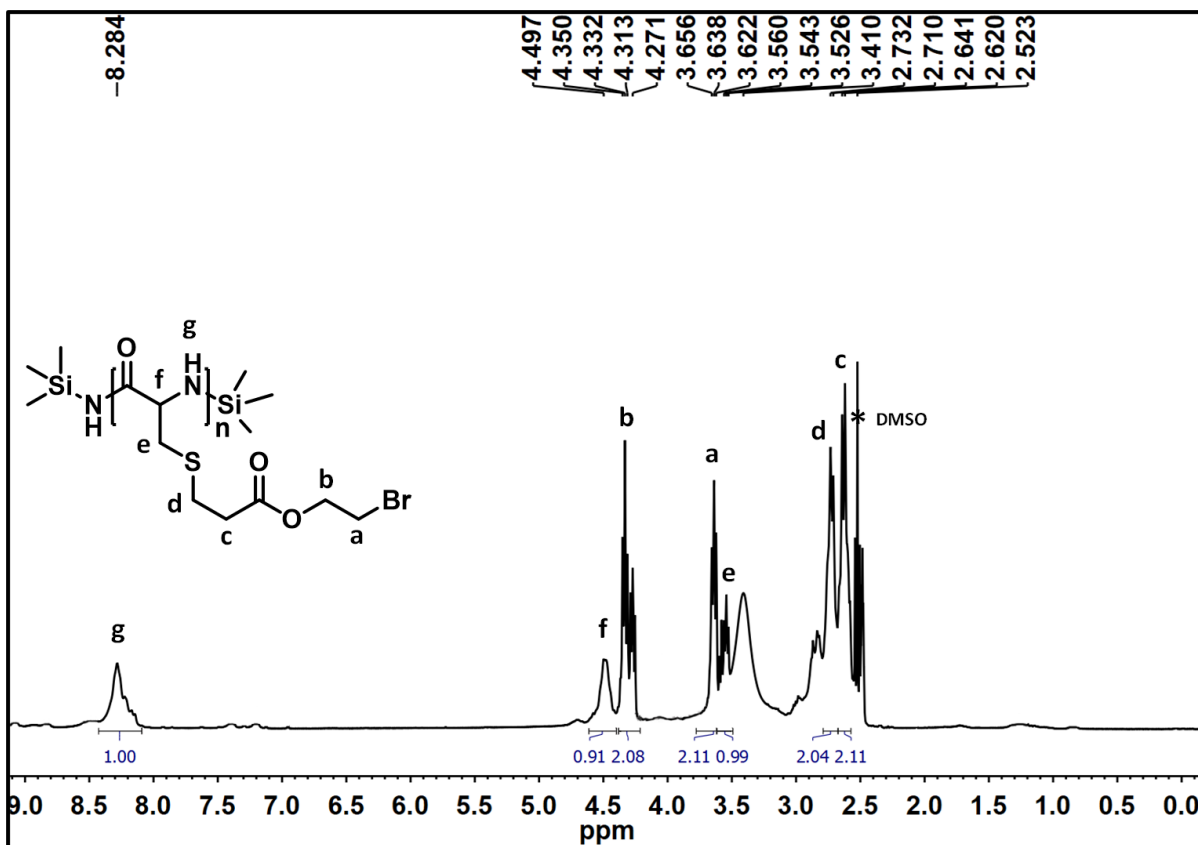

**Figure S12.** <sup>1</sup>H-NMR spectrum of PCys-Br-1 in DMSO-d<sub>6</sub>.

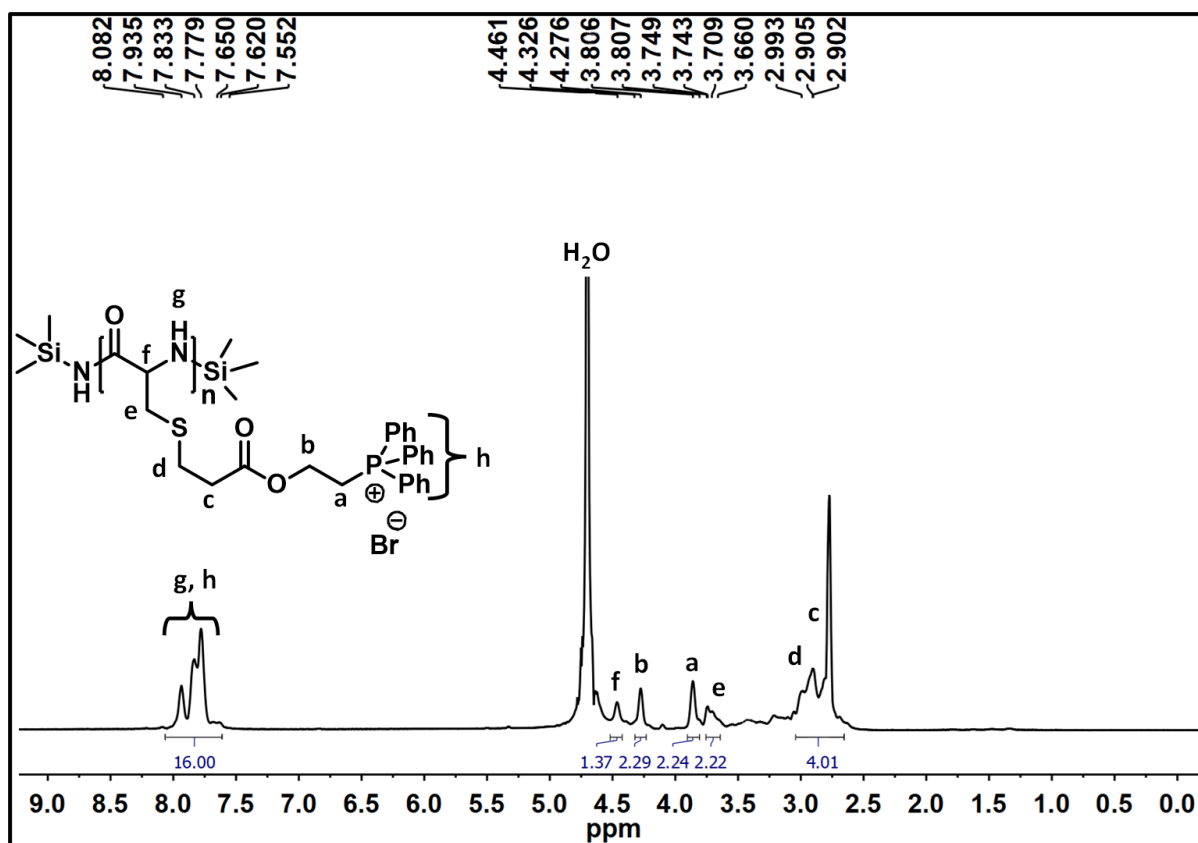

**Figure S13.** <sup>1</sup>H-NMR spectrum of P[Cys-PPh<sub>3</sub>]<sup>+</sup>[Br<sup>-</sup>]-1 in D<sub>2</sub>O.



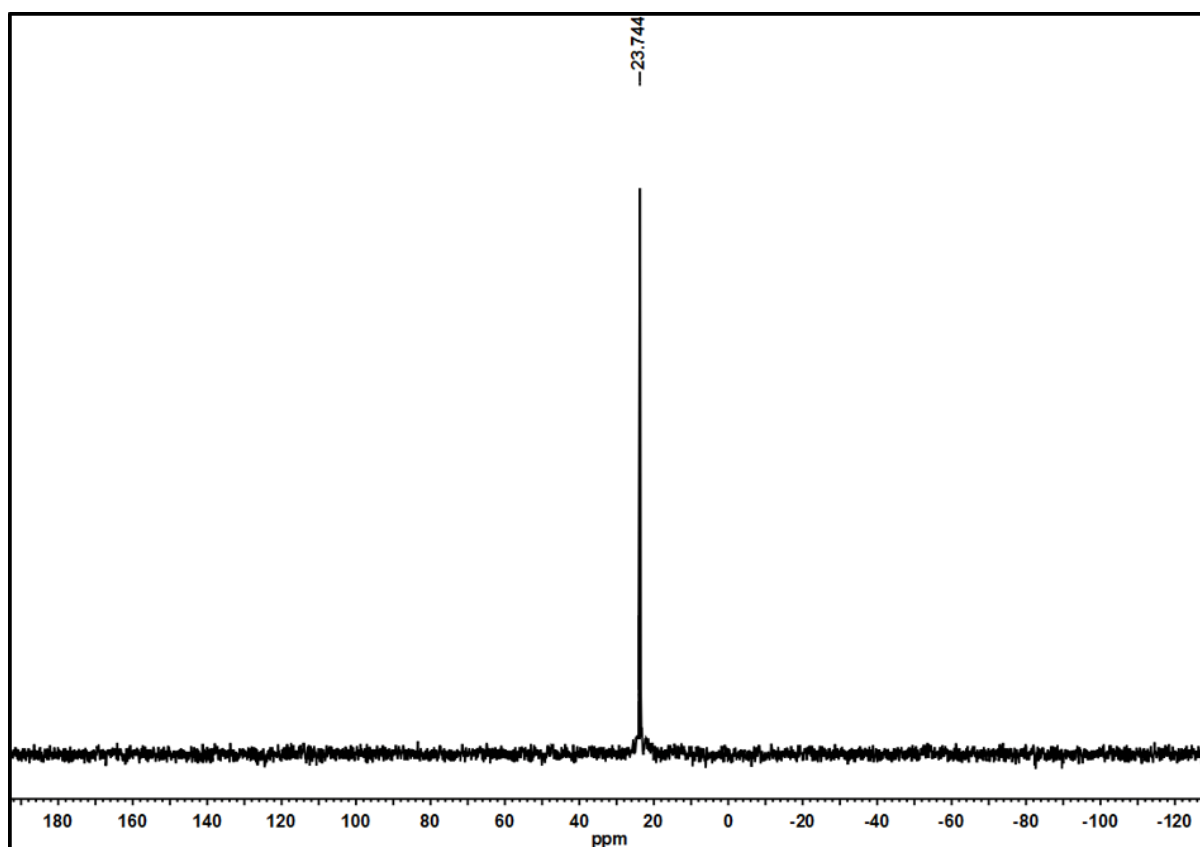

**Figure S14.**  $^{31}\text{P}$ -NMR spectrum of  $\text{P}[\text{Cys-PPh}_3]^+[\text{Br}^-]-1$  in  $\text{D}_2\text{O}$ .

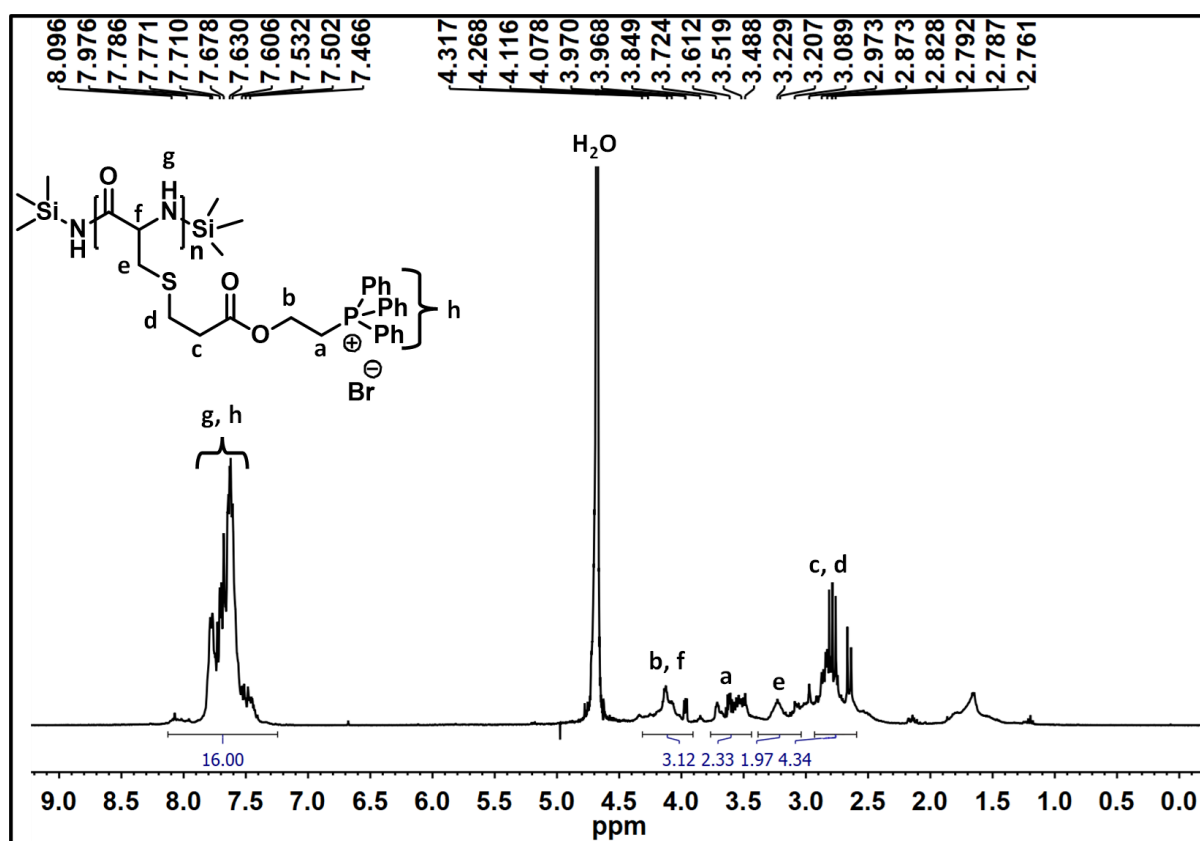

**Figure S15.** <sup>1</sup>H-NMR spectrum of P[Cys-PPh<sub>3</sub>]<sup>+</sup>[Br<sup>-</sup>]<sub>2</sub> in D<sub>2</sub>O.

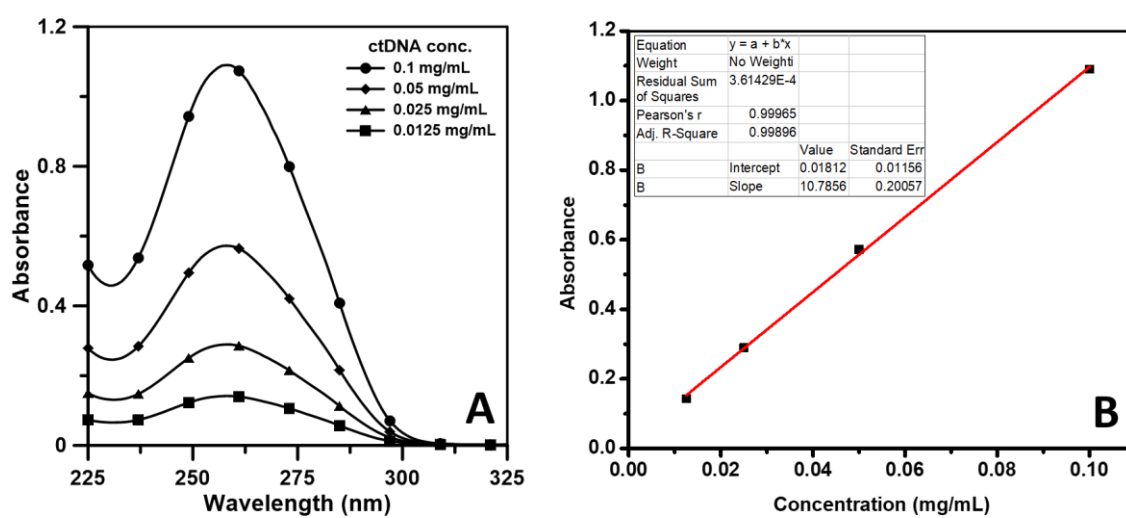

**Figure S16.** UV-Vis absorption spectra of neat ctDNA in Tris-HCl buffer against the variation of its concentration (A). Calibration curve of neat ctDNA in Tris-HCl buffer (B).

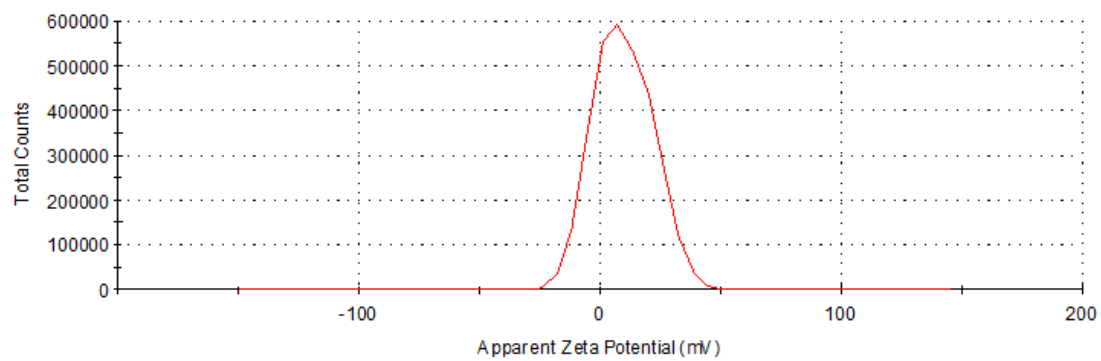

**Figure S17.** Zeta potential ( $\xi$ ) curve of 0.1 wt% P[Cys-PPh<sub>3</sub>]<sup>+</sup>[Br<sup>-</sup>]-1 in H<sub>2</sub>O.

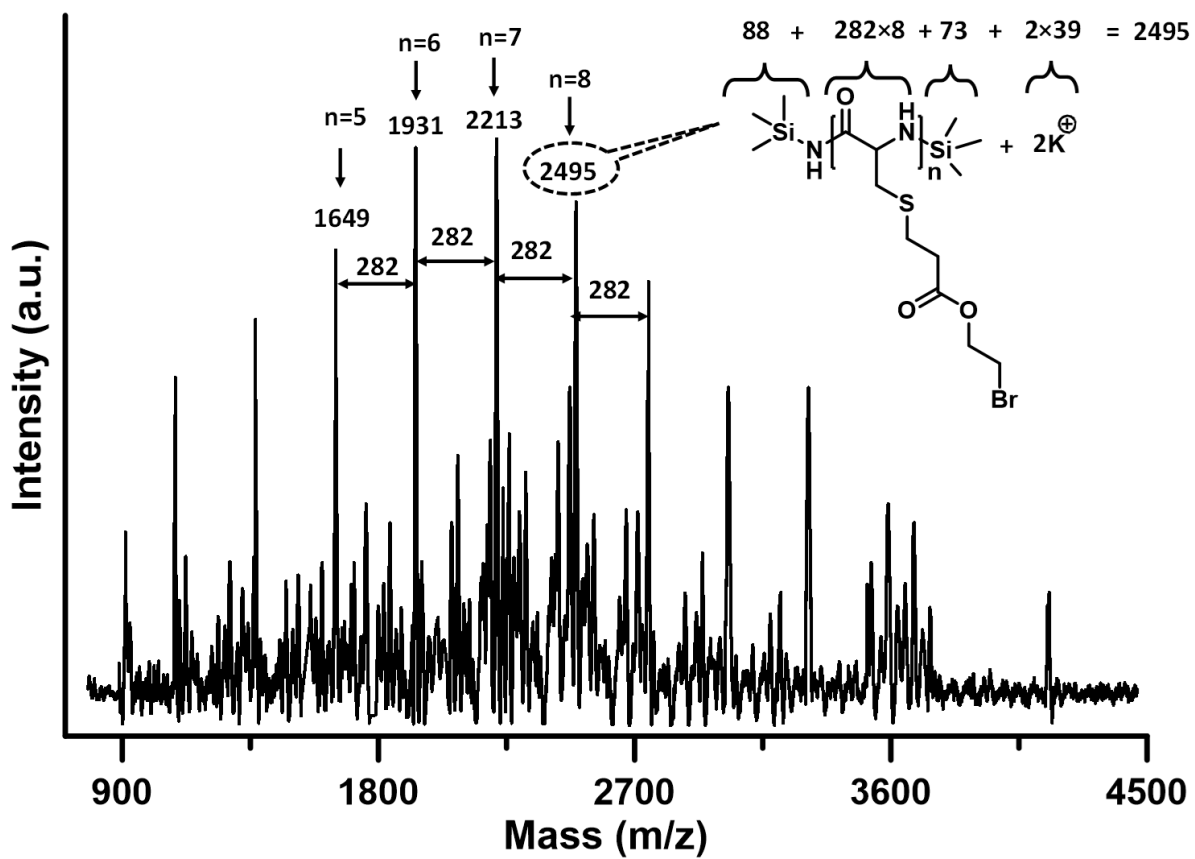

**Figure S18.** MALDI-TOF-MS of PCys-Br-1 in DMF using DHB matrix and NaI.

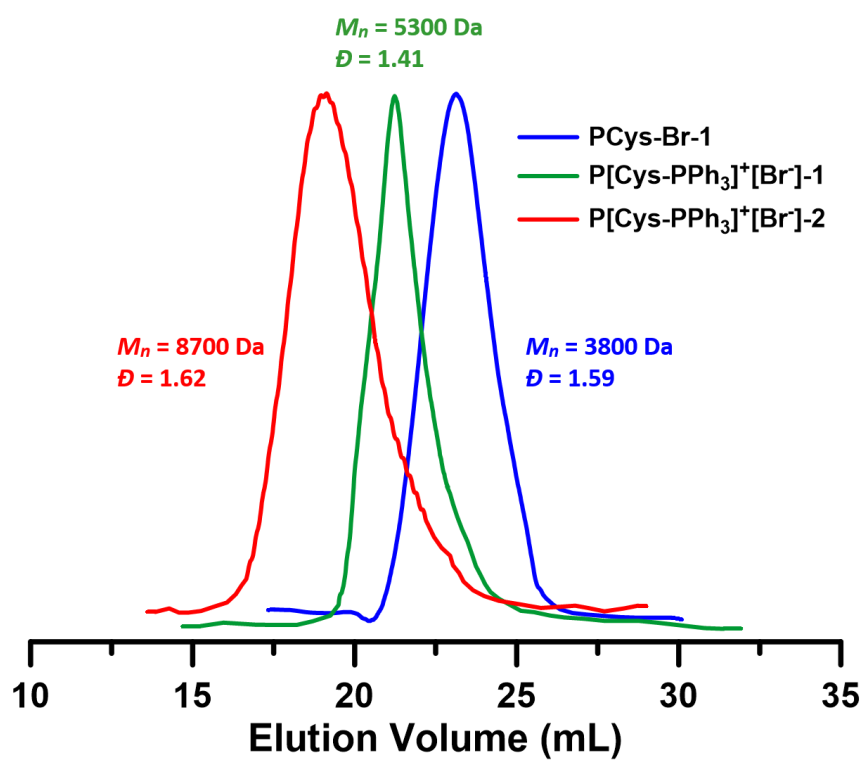

**Figure S19.** SEC chromatograms of PCys-Br-1, P[Cys-PPh<sub>3</sub>]<sup>+</sup>[Br<sup>-</sup>]-1 and P[Cys-PPh<sub>3</sub>]<sup>+</sup>[Br<sup>-</sup>]-2.

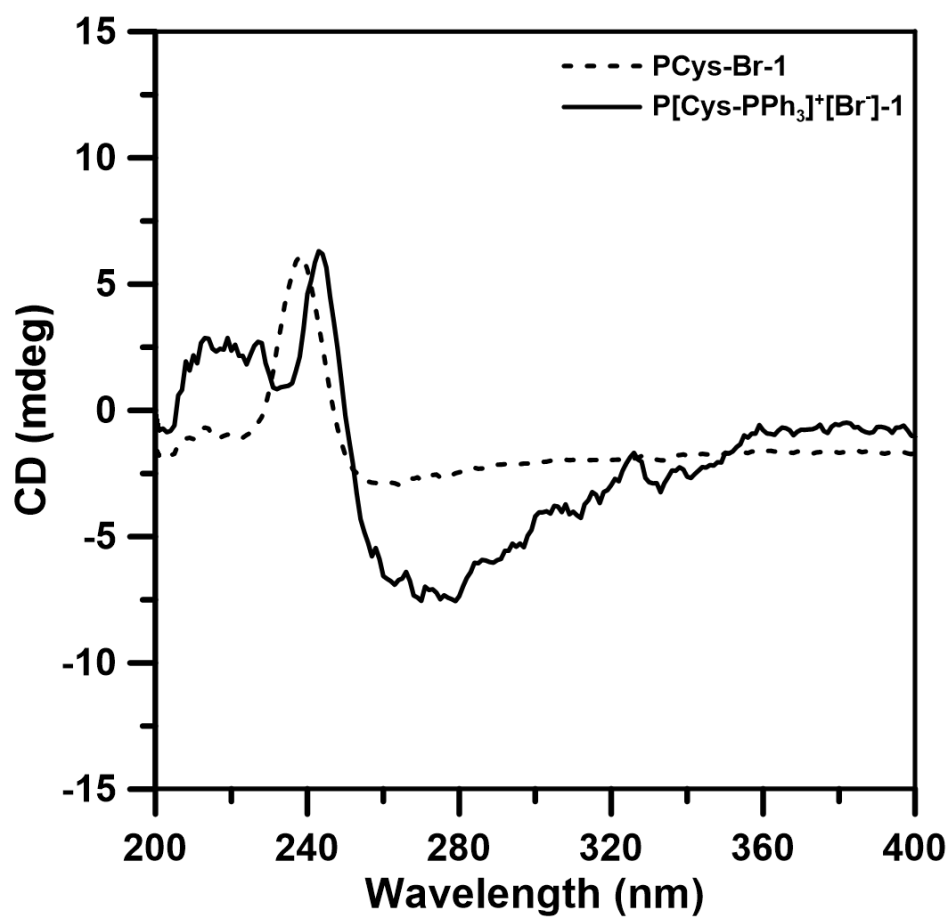

**Figure S20.** CD spectra of PCys-Br-1 and P[Cys-PPh<sub>3</sub>]<sup>+</sup>[Br<sup>-</sup>]-1 showing antiparallel  $\beta$ -sheet like secondary structure.

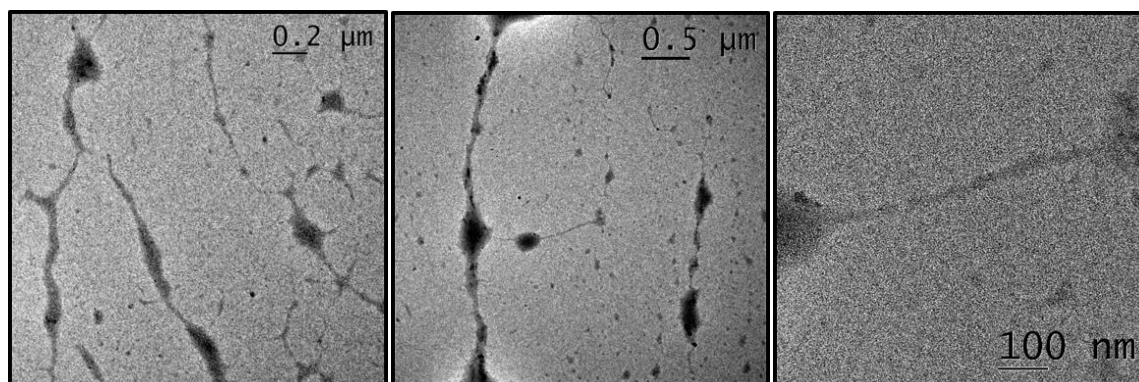

**Figure S21.** TEM image of P[Cys-PPh<sub>3</sub>]<sup>+</sup>[Br<sup>-</sup>]-1(1 mg/mL) in water.



**Table S1.** Sizes of aggregates of P[Cys-PPh<sub>3</sub>]<sup>+</sup>[Br<sup>-</sup>]-1 (0.5 wt%) in the presence of anions in water obtained from DLS experiment

| <b>Polypeptide</b>                                                        | <b>Anion</b>                  | <b>[Anion]<sub>min</sub><br/>(mM)</b> | <b><sup>a</sup>D<sub>h</sub> at<br/>25 °C<br/>(nm)</b> | <b><sup>b</sup>T<sub>cp</sub> (°C)<br/>(DLS)<br/>(Heating)</b> | <b>T<sub>cp</sub> (°C)<br/>(Turbidity)<br/>(Heating)</b> | <b>T<sub>cp</sub> (°C)<br/>(Turbidity)<br/>(Cooling)</b> |
|---------------------------------------------------------------------------|-------------------------------|---------------------------------------|--------------------------------------------------------|----------------------------------------------------------------|----------------------------------------------------------|----------------------------------------------------------|
|                                                                           | BF <sub>4</sub> <sup>-</sup>  | 115                                   | 1700                                                   | 36                                                             | 39                                                       | 37                                                       |
| <b>P[Cys-PPh<sub>3</sub>]<sup>+</sup>[Br<sup>-</sup>]-1<br/>(0.5 wt%)</b> | I <sup>-</sup>                | 65                                    | 1200                                                   | 40                                                             | 45                                                       | 47                                                       |
|                                                                           | ClO <sub>4</sub> <sup>-</sup> | 35                                    | 850                                                    | 49                                                             | 57                                                       | 57.4                                                     |
|                                                                           | SCN <sup>-</sup>              | 15                                    | 800                                                    | 58                                                             | 66                                                       | 67                                                       |

<sup>a</sup> D<sub>h</sub> – Hydrodynamic diameter

<sup>b</sup> T<sub>cp</sub> – Cloud point (data obtained from the temperature-dependent DLS study as shown in Figure S13)

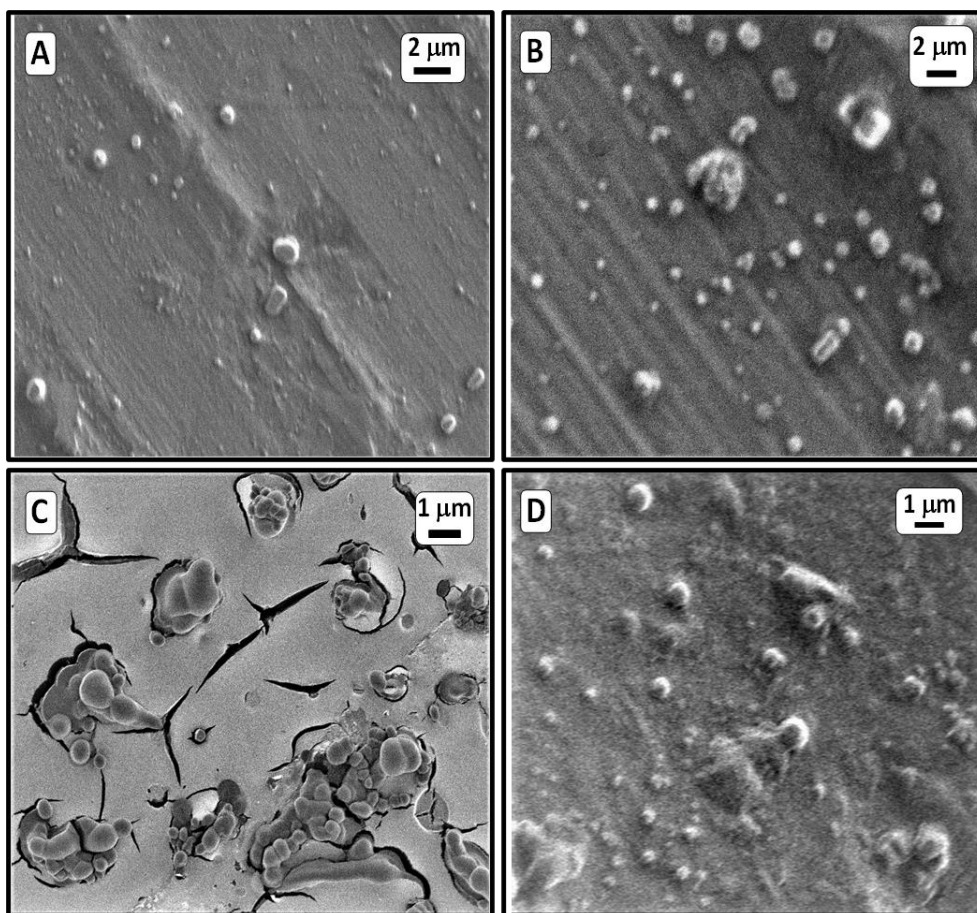

**Figure S22.** FESEM images of P[Cys-PPh<sub>3</sub>]<sup>+</sup>[Br<sup>-</sup>]-1 (0.5 wt%) aggregates in water in the presence of 115 mM BF<sub>4</sub><sup>-</sup> (A), 65 mM I<sup>-</sup> (B), 35 mM ClO<sub>4</sub><sup>-</sup> (C) and 15 mM SCN<sup>-</sup> (D), showing spherical morphologies.

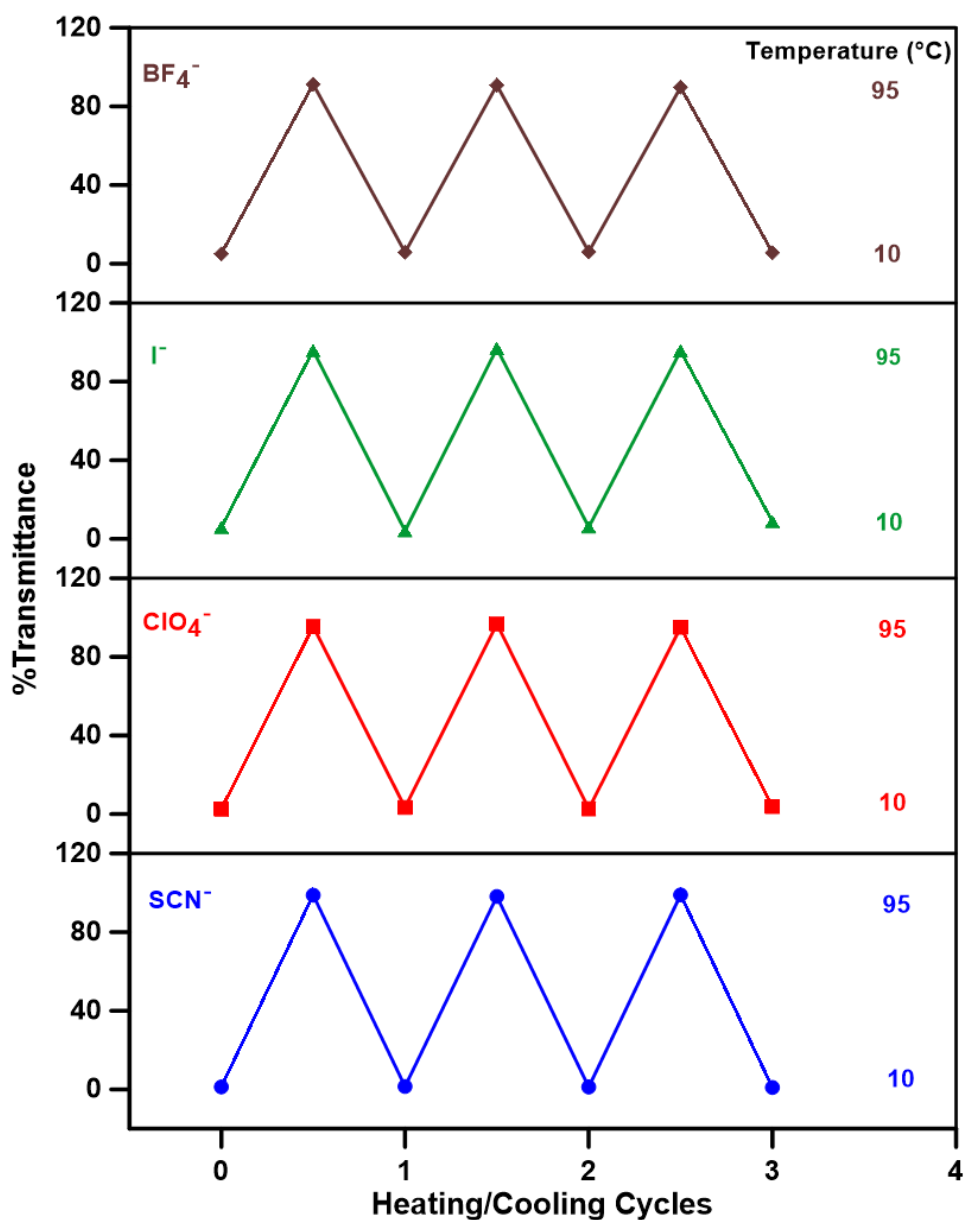

**Figure S23.** Temperature-dependent % transmittance of 0.5 wt% aqueous P[Cys-PPh<sub>3</sub>]<sup>+</sup>[Br<sup>-</sup>]-1 solutions in the presence of different chaotropic anions. Each data point was obtained after equilibrating the corresponding sample solution at the particular temperature for 5 min.

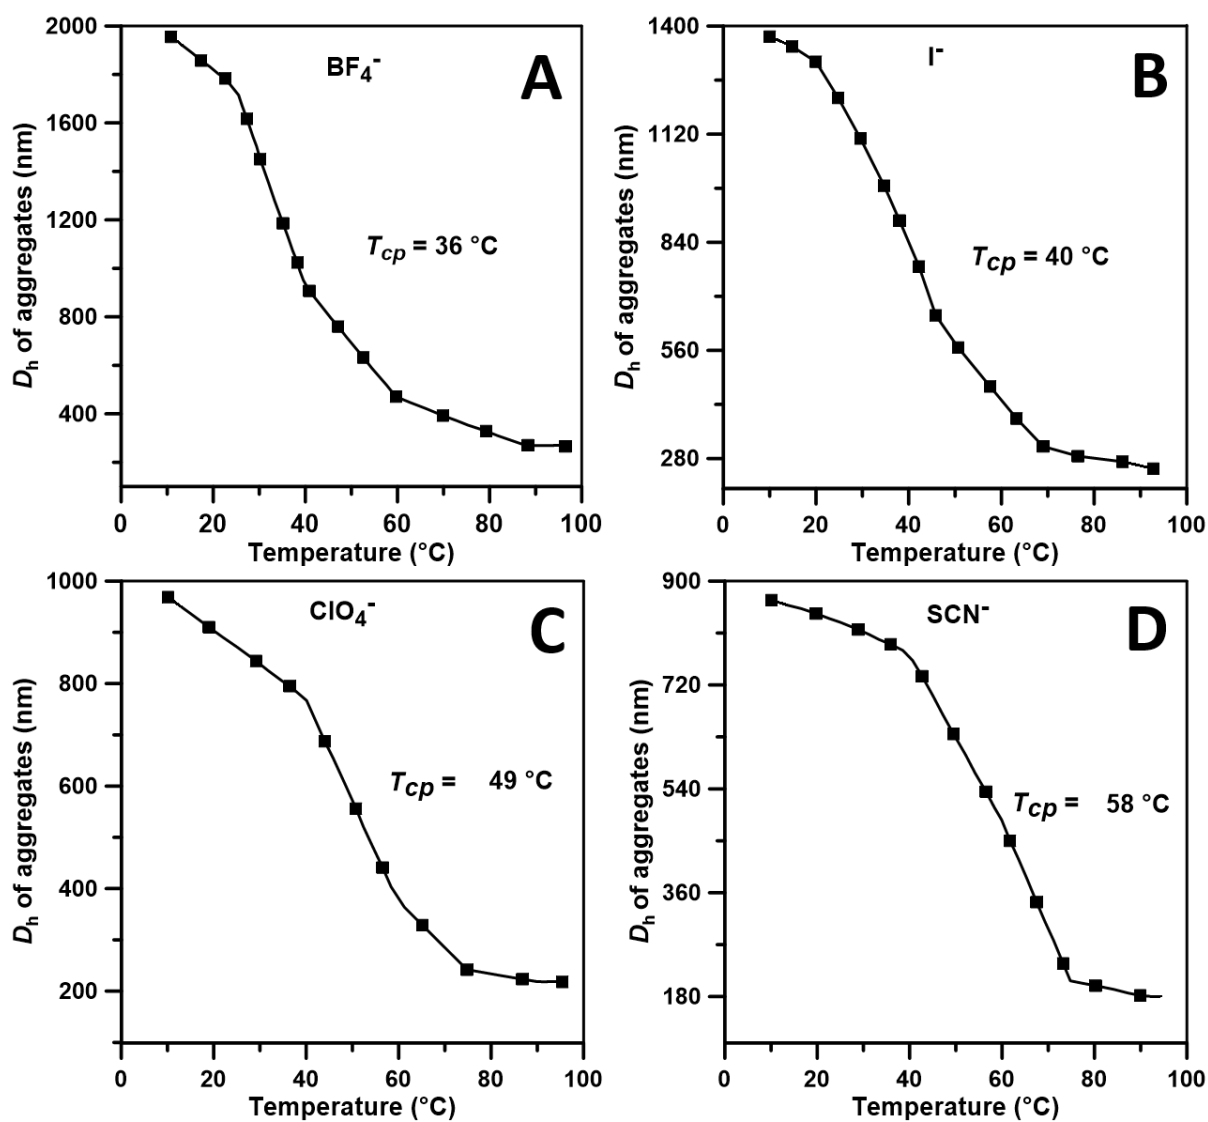

**Figure S24.** Variation of the  $D_h$ s of aggregates of P[Cys-PPh<sub>3</sub>]<sup>+</sup>[Br<sup>-</sup>]-1 (0.5 wt%) in the presence of 115 mM  $\text{BF}_4^-$  (A), 65 mM  $\text{I}^-$  (B), 35 mM  $\text{ClO}_4^-$  (C) and 15 mM  $\text{SCN}^-$  (D) at different temperatures.

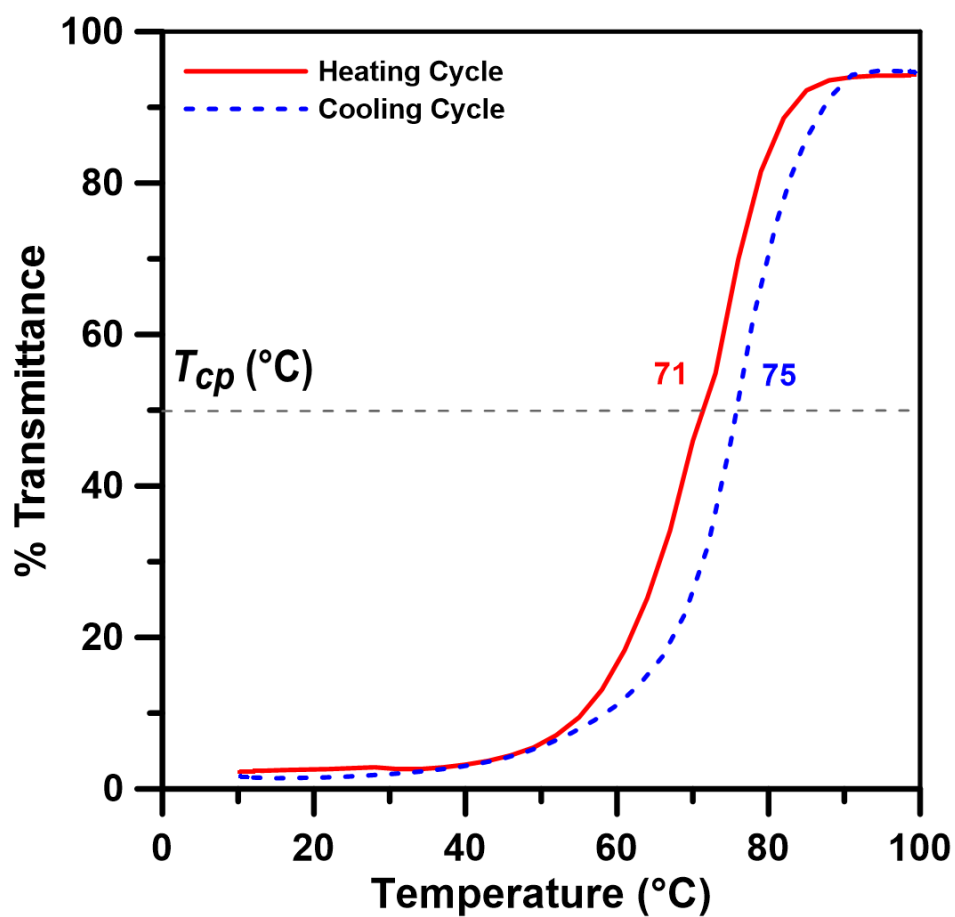

**Figure S25.** Turbidity plot ( $\lambda = 500$  nm) of aqueous P[Cys-PPh<sub>3</sub>]<sup>+</sup>[Br<sup>-</sup>]-2 (0.5 wt%) solution in the presence of 22 mM SCN<sup>-</sup>.

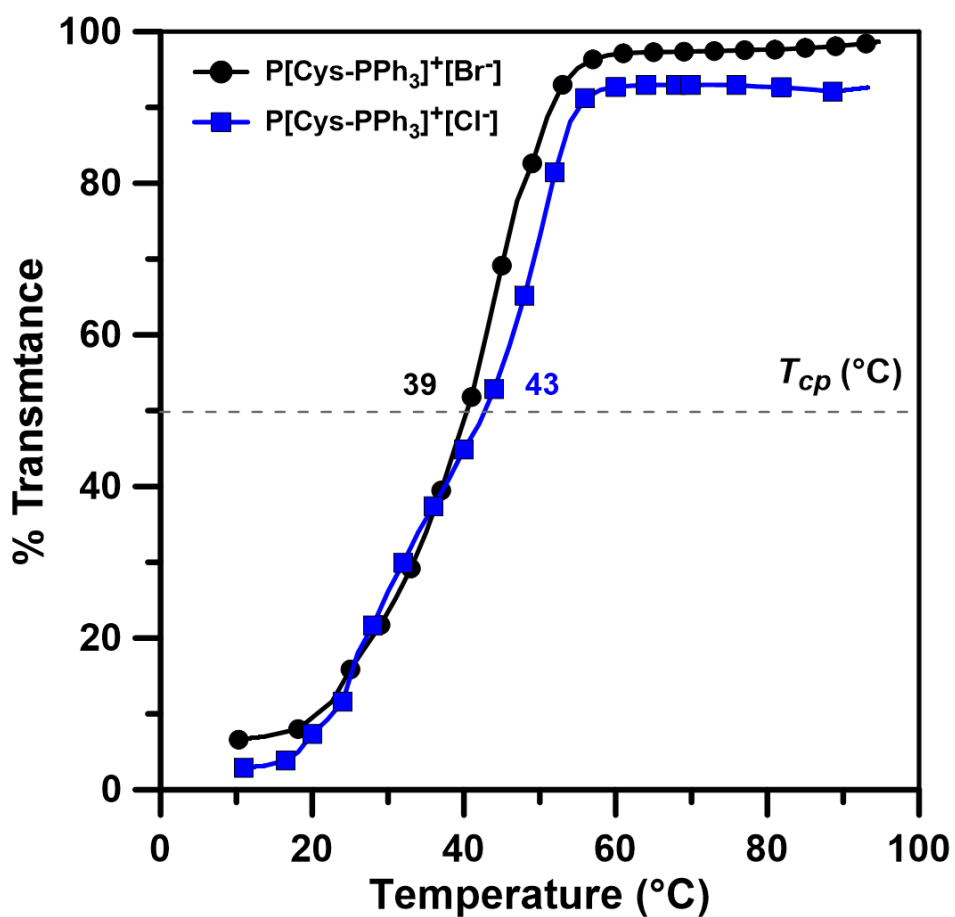

**Figure S26.** Turbidity plot ( $\lambda = 500$  nm) of aqueous P[Cys-PPh<sub>3</sub>]<sup>+</sup>[Br<sup>-</sup>] and P[Cys-PPh<sub>3</sub>]<sup>+</sup>[Cl<sup>-</sup>] (0.5 wt%) solution in the presence of 115 mM BF<sub>4</sub><sup>-</sup>.

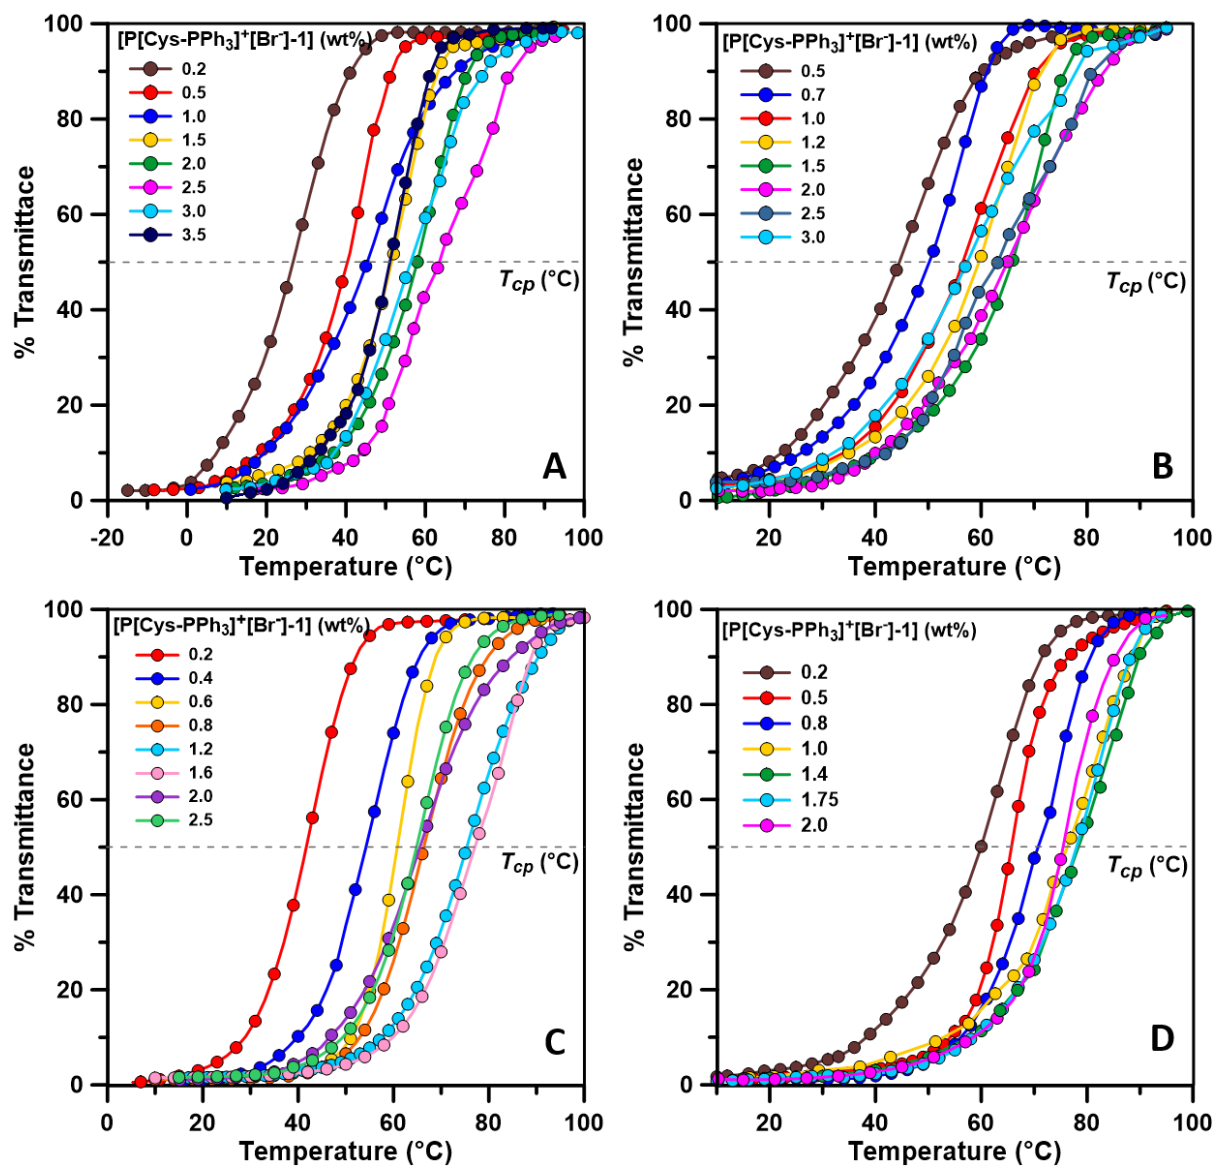

**Figure S27.** Turbidity plots ( $\lambda = 500$  nm) of aqueous P[Cys-PPh<sub>3</sub>]<sup>+</sup>[Br<sup>-</sup>]-1 solutions with varying polypeptide concentration in the presence of 115 mM BF<sub>4</sub><sup>-</sup> (A), 65 mM I<sup>-</sup> (B), 35 mM ClO<sub>4</sub><sup>-</sup> (C) and 15 mM SCN<sup>-</sup> (D).

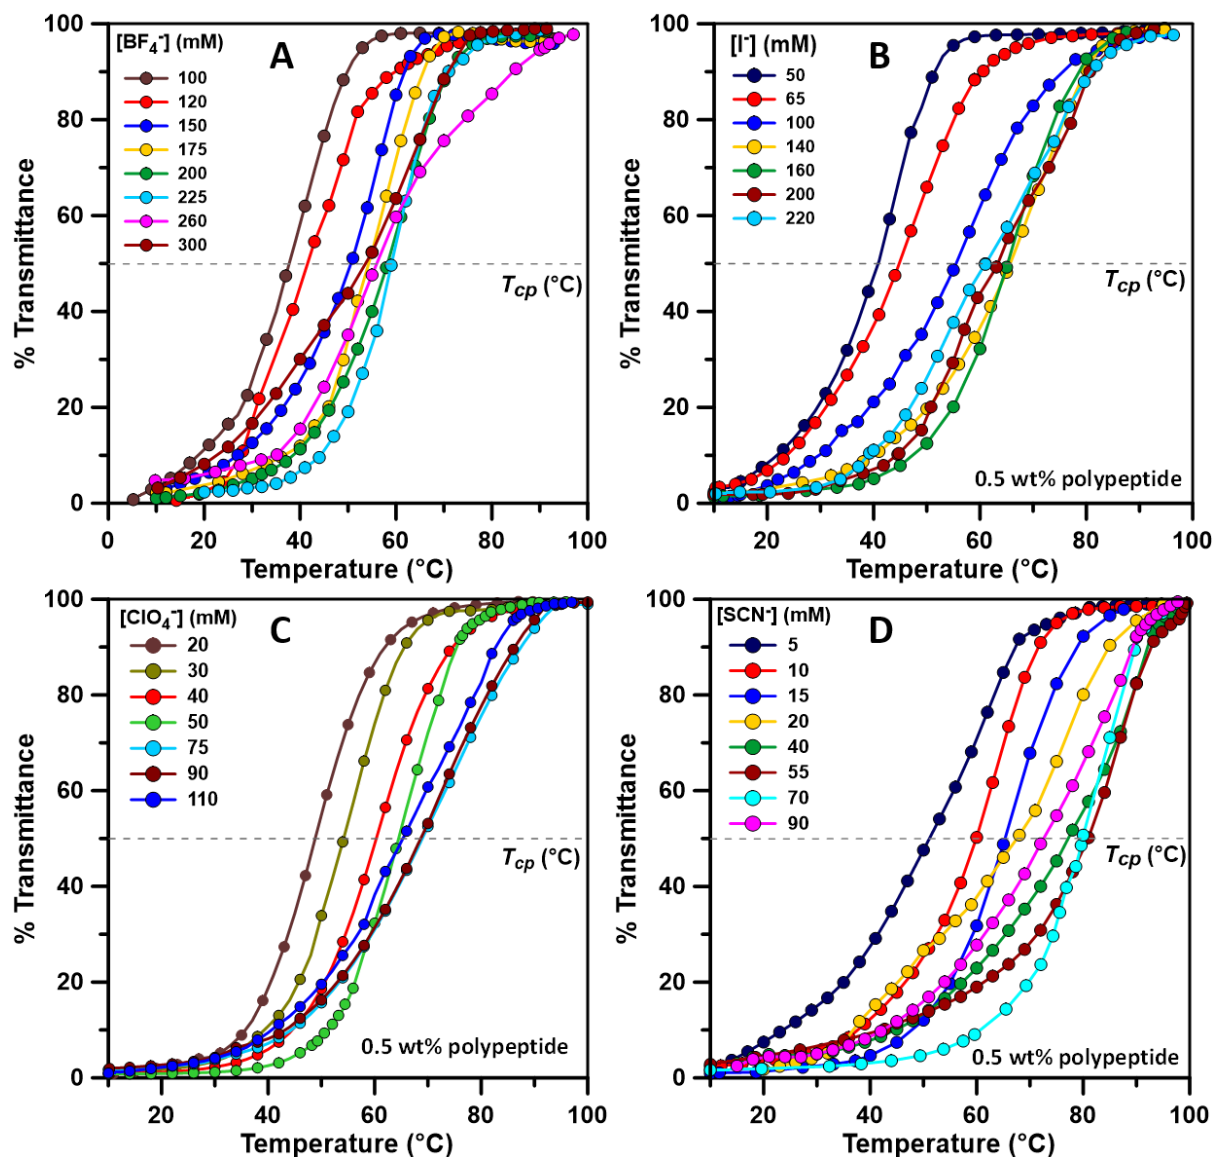

**Figure S28.** Turbidity plots ( $\lambda = 500$  nm) of 0.5 wt% aqueous P[Cys-PPh<sub>3</sub>]<sup>+</sup>[Br<sup>-</sup>]-1 solutions with varying concentration of BF<sub>4</sub><sup>-</sup> (A), I<sup>-</sup> (B), ClO<sub>4</sub><sup>-</sup> (C) and SCN<sup>-</sup> (D).



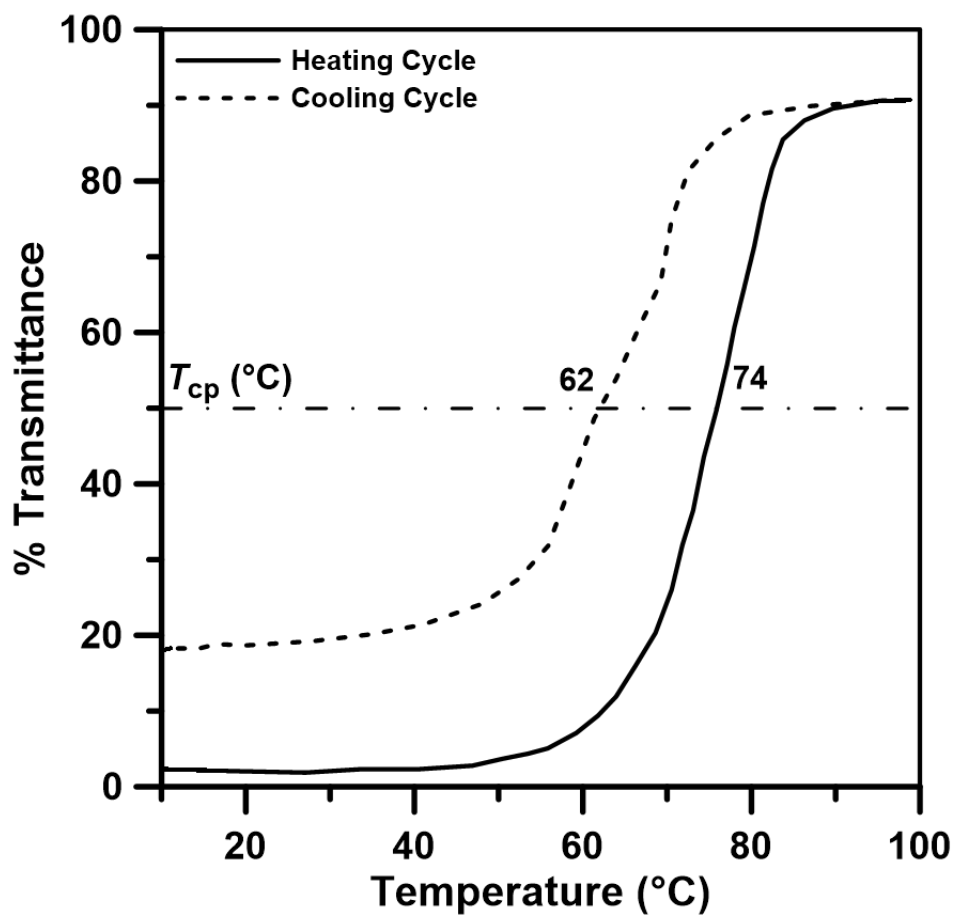

**Figure S29.** UCST-type turbidity curve ( $\lambda = 500$  nm) of 0.5 wt% aqueous solution of P[Cys-PPh<sub>3</sub>]<sup>+</sup>[Br<sup>-</sup>]-1 in the presence of 500 μM of SDS; heating and cooling run showed huge hysteresis.

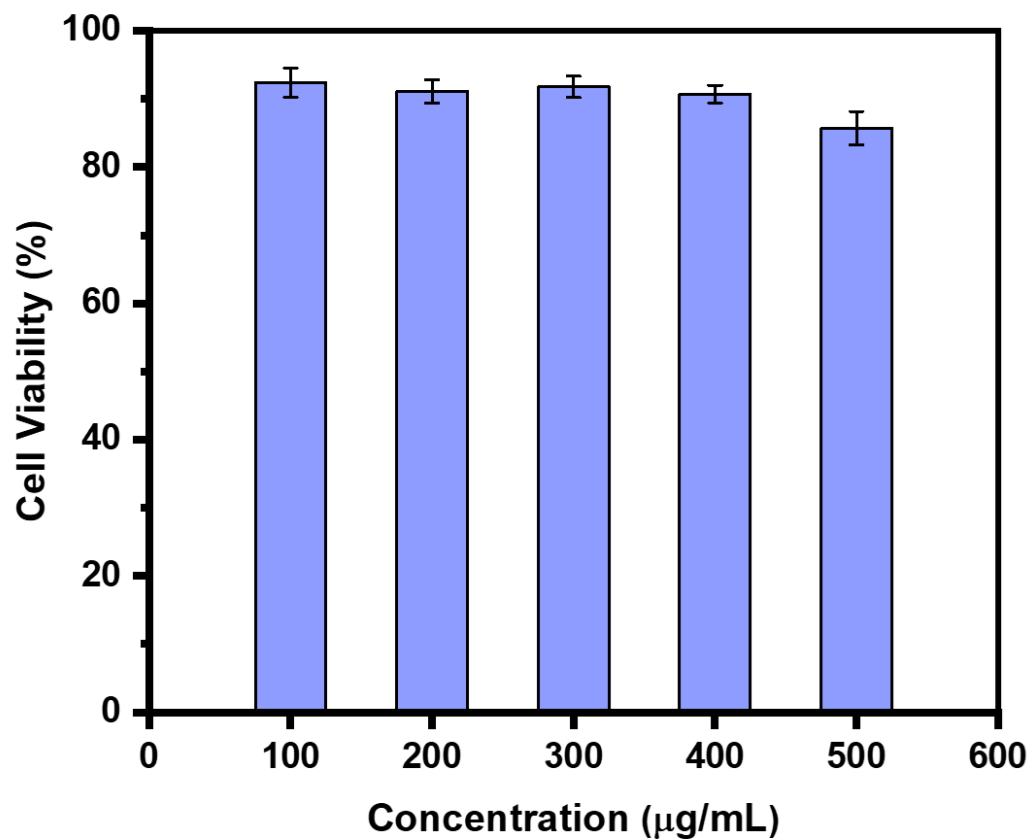

**Figure S30.** The cell viability of KB cells with different concentrations of P[Cys- $\text{PPh}_3$ ] $^+$ [Br $^-$ ]-1 with after 24 h of incubation.

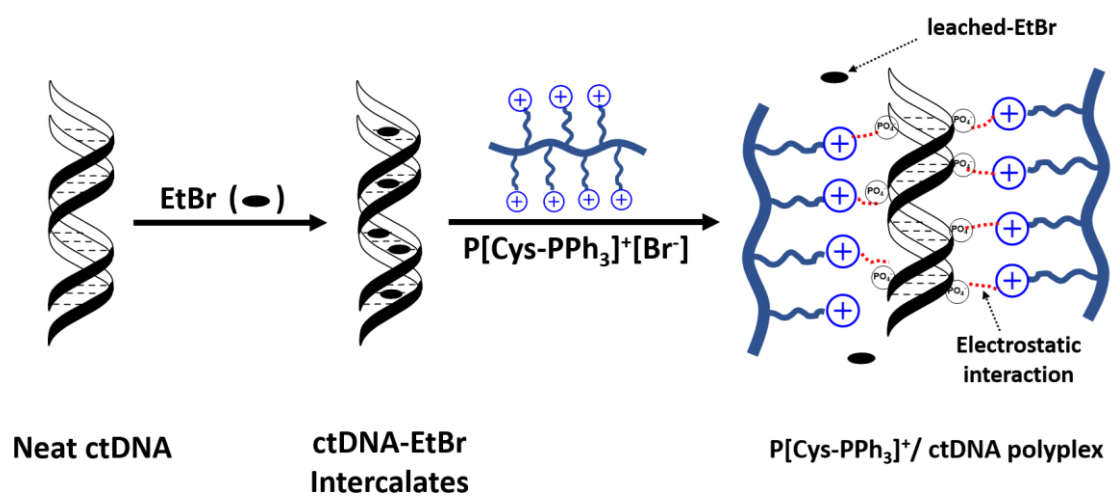

**Scheme S2.** Schematics of polyplex formation of P[Cys-PPh<sub>3</sub>]<sup>+</sup>[Br<sup>-</sup>] with ctDNA in aqueous solution.

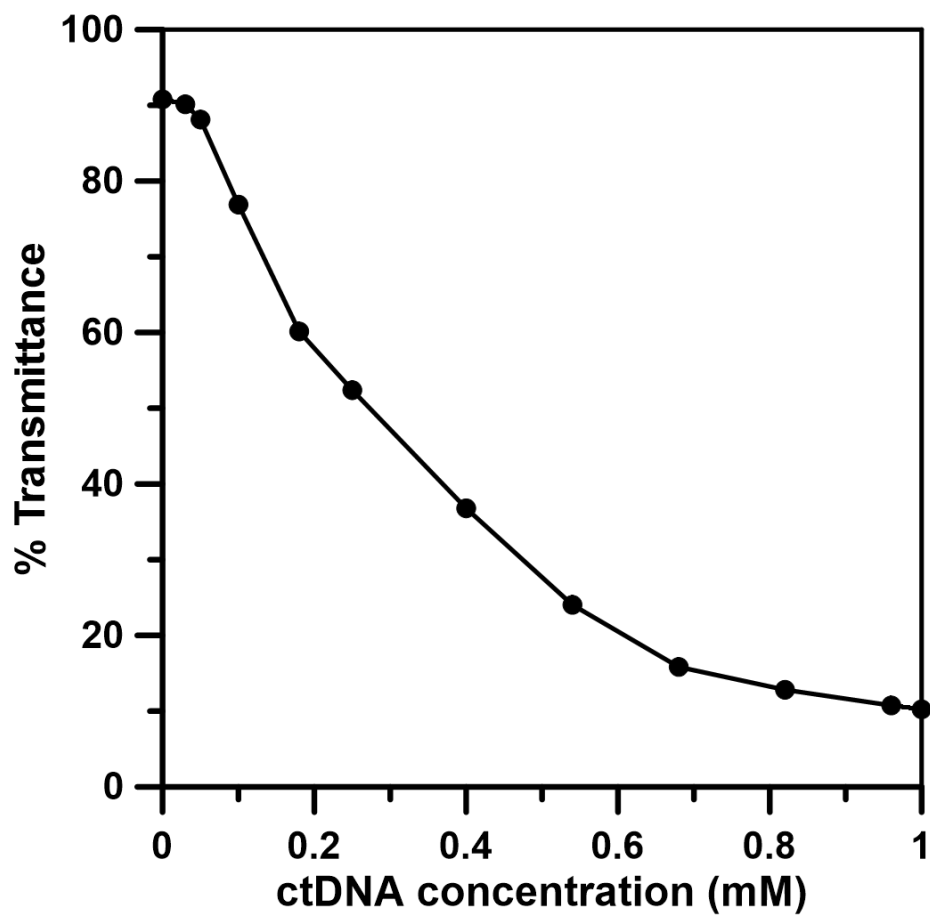

**Figure S31.** Titration plot, showing the % transmittance of 0.5 wt% aqueous P[Cys- $\text{PPh}_3$ ] $^+$ [Br $^-$ ]-1 solution in the presence of different concentration of ctDNA.

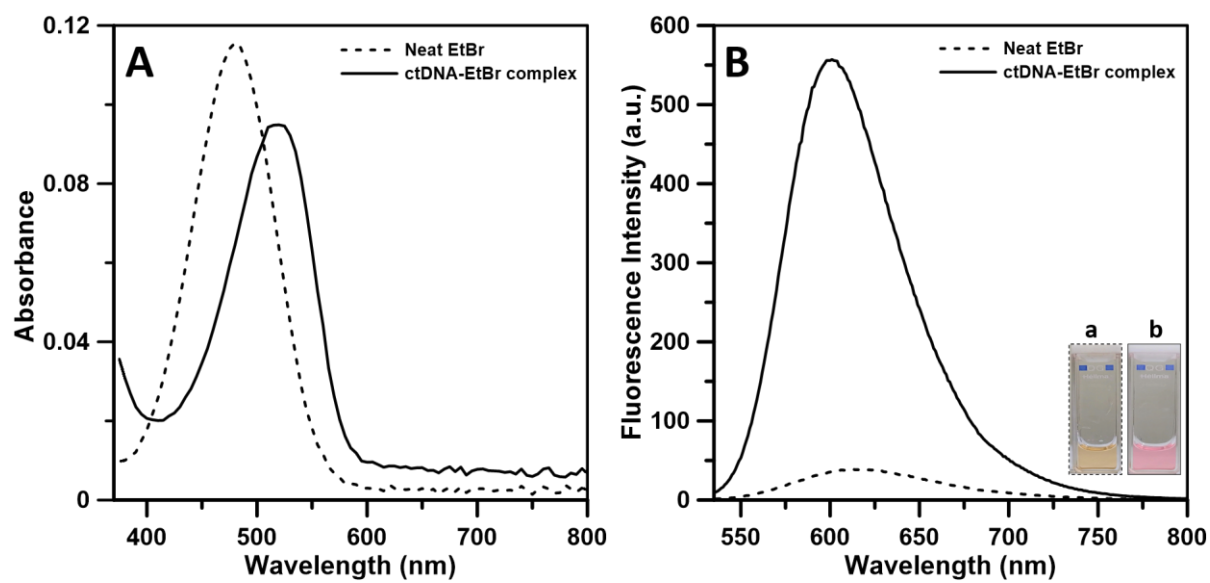

**Figure S32.** Absorption (A) and emission (B) spectra of neat EtBr in water and EtBr-ctDNA complex in Tris-HCl buffer. Inset of the Figure B showed the change in colour of EtBr solution before (a) and after (b) the intercalation with ctDNA.

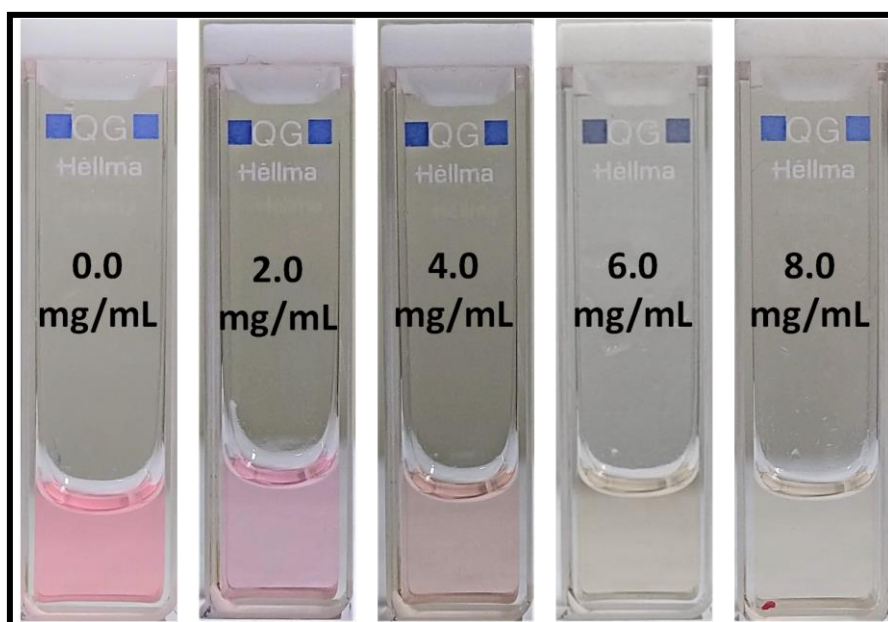

**Figure S33.** Photographs showing the decrease in colour intensity of the ctDNA-EtBr complex with increase in  $P[Cys-PPh_3]^+[Br^-]-1$  concentration in Tris-HCl buffer, indicating the leaching out of EtBr from its intercalated state into the bulk solvent.

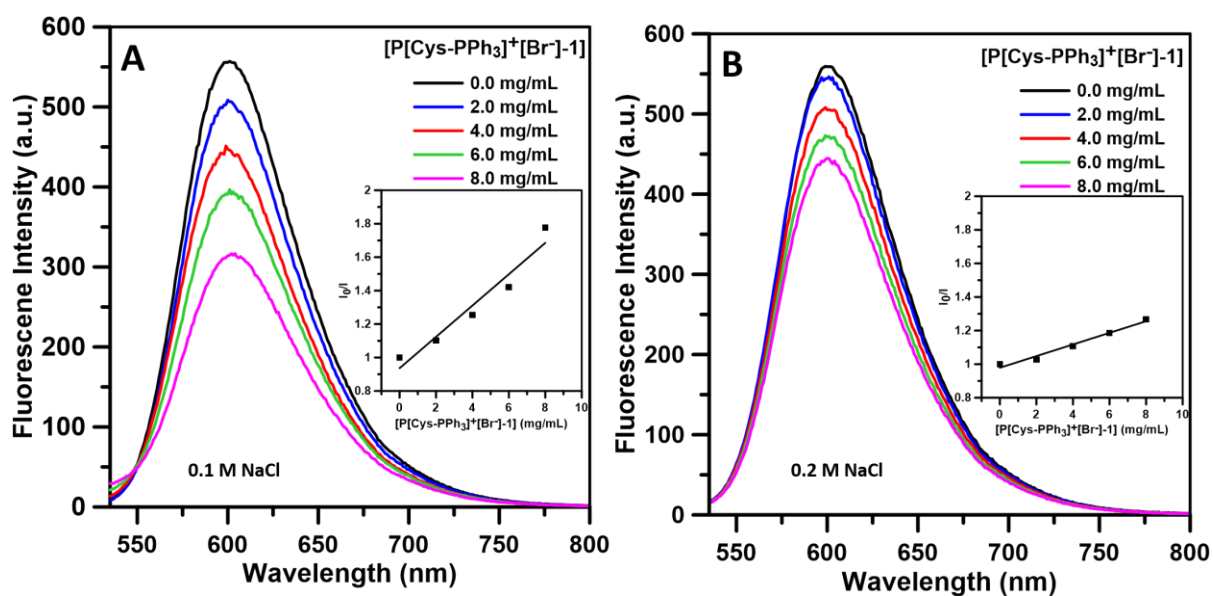

**Figure S34.** Emission spectra of EtBr-ctDNA complex in the presence of different amount of P[Cys-PPh<sub>3</sub>]<sup>+</sup>[Br<sup>-</sup>]-1 with 0.1 M NaCl (A) and 0.2 M NaCl (B) showing the decrease in extent of fluorescence quenching with increase of the ionic strength. The insets of the both figures showed the plot of  $I_0/I$  vs respective [P[Cys-PPh<sub>3</sub>]<sup>+</sup>[Br<sup>-</sup>]-1], revealing the decrease in fluorescence quenching of EtBr-ctDNA complex by P[Cys-PPh<sub>3</sub>]<sup>+</sup>[Br<sup>-</sup>]-1.
